# Supplementary material for: Making the Most of Its Short Reads: A Bioinformatics Workflow for Analysing the Short-Read-Only Data of Leishmania orientalis (Formerly Named Leishmania siamensis) Isolate PCM2 in Thailand
Source: MDPI journal article supplement (doi:10.3390/biology11091272), 2022-08-26

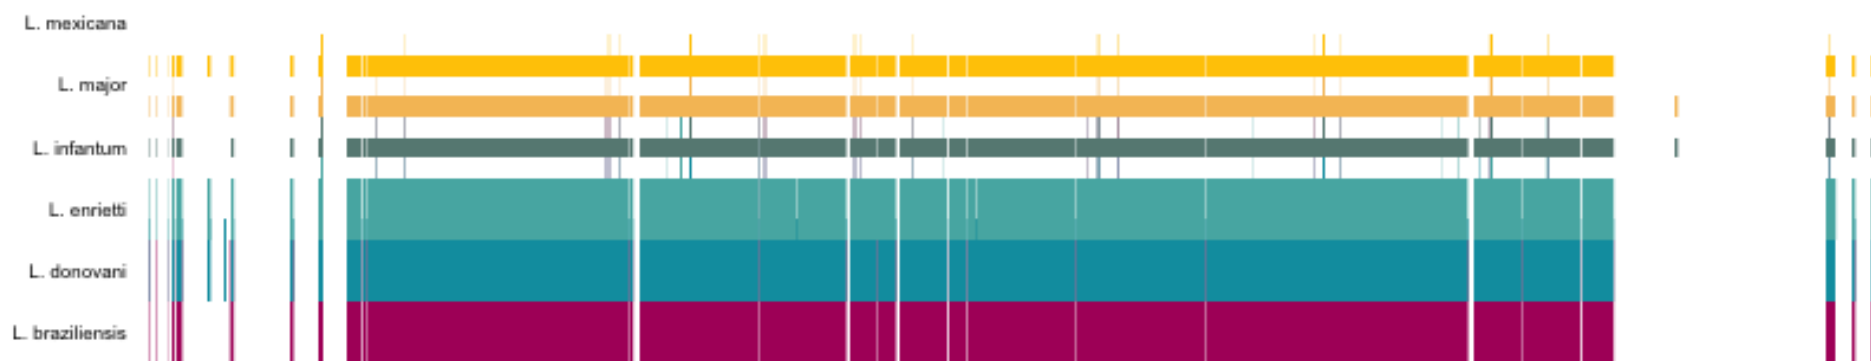

Chr1

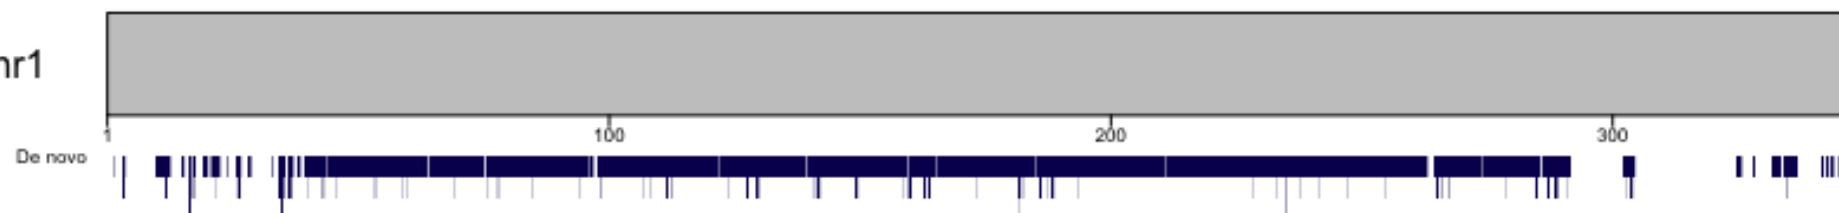

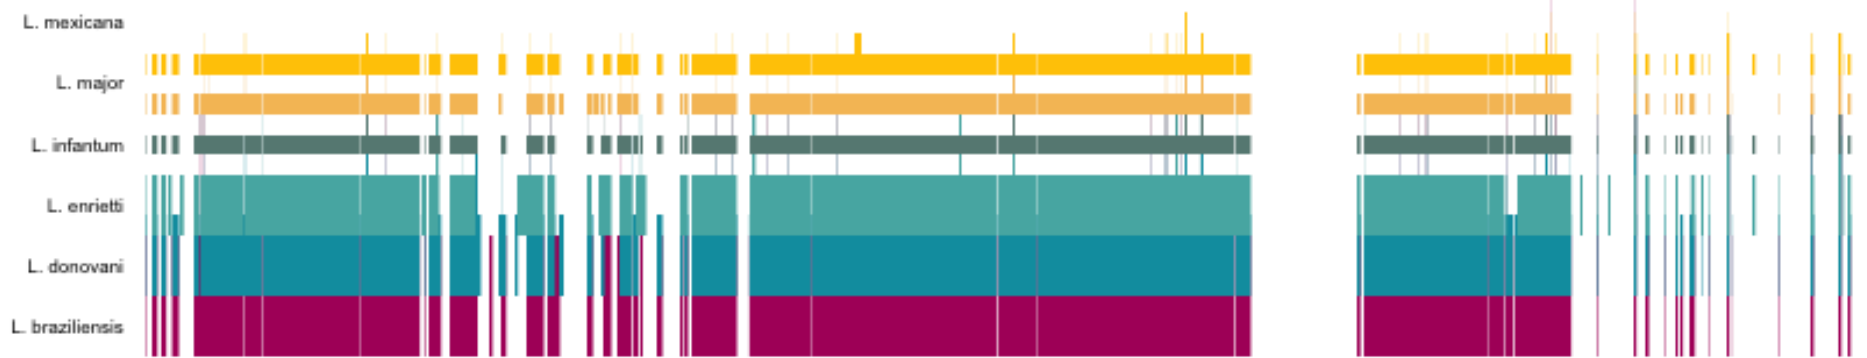

Chr2

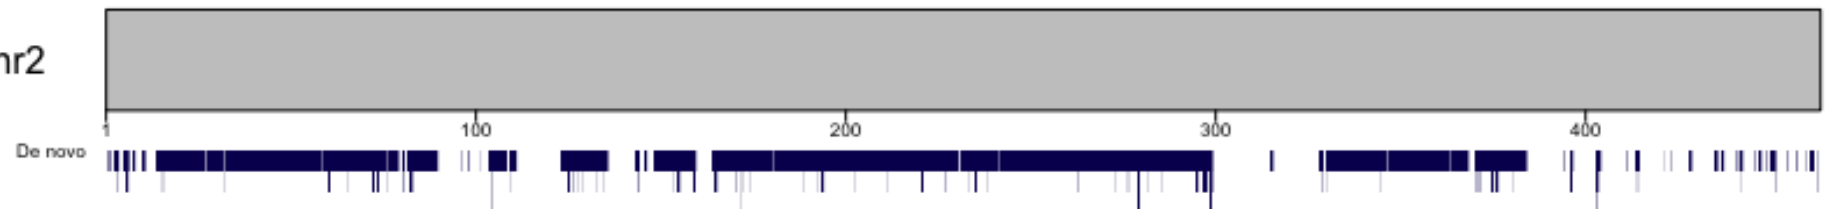

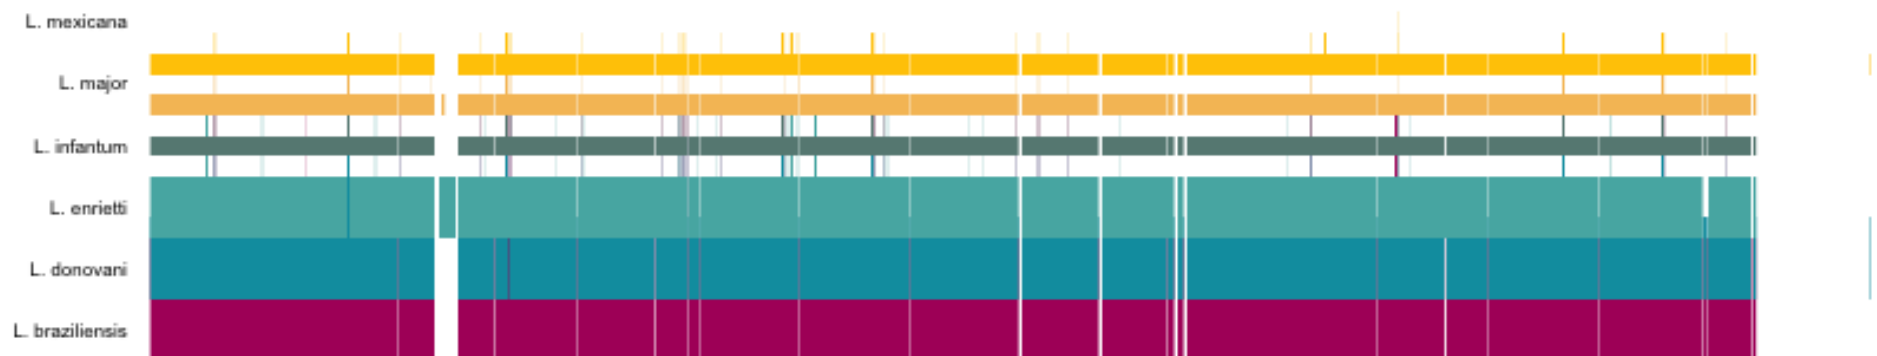

Chr3

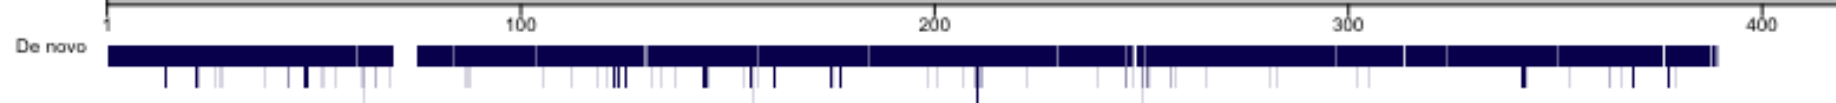

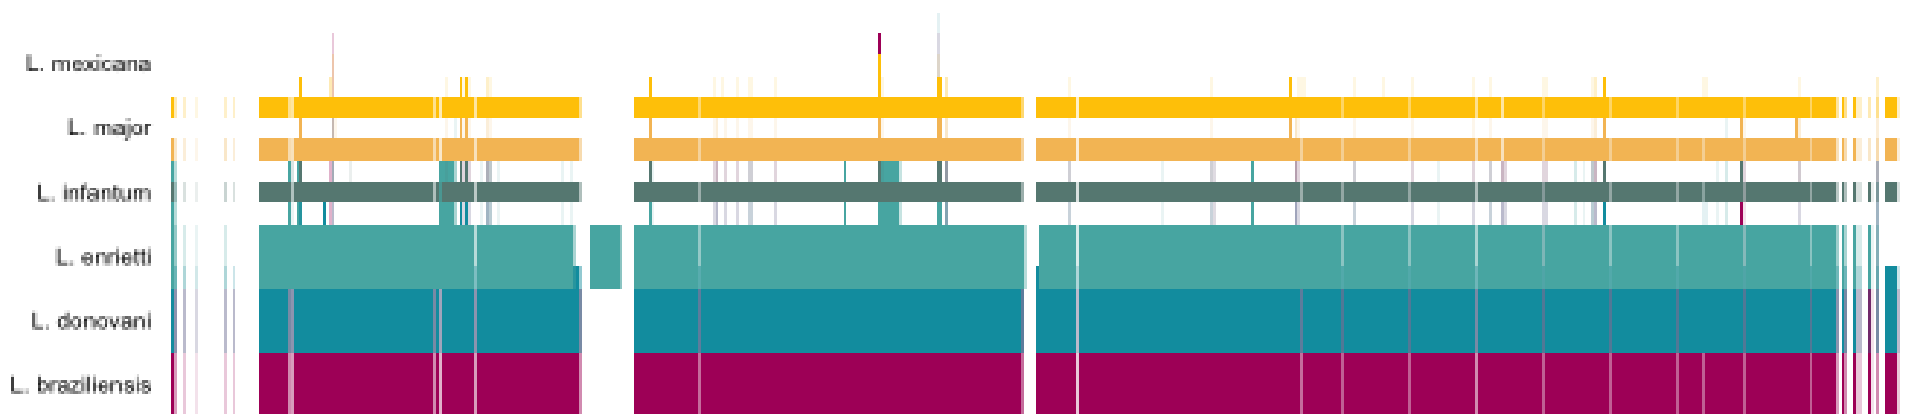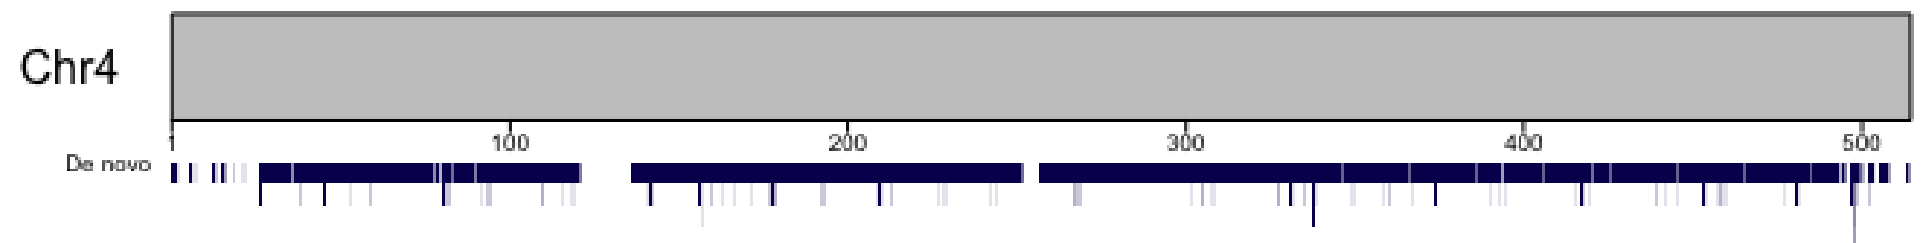

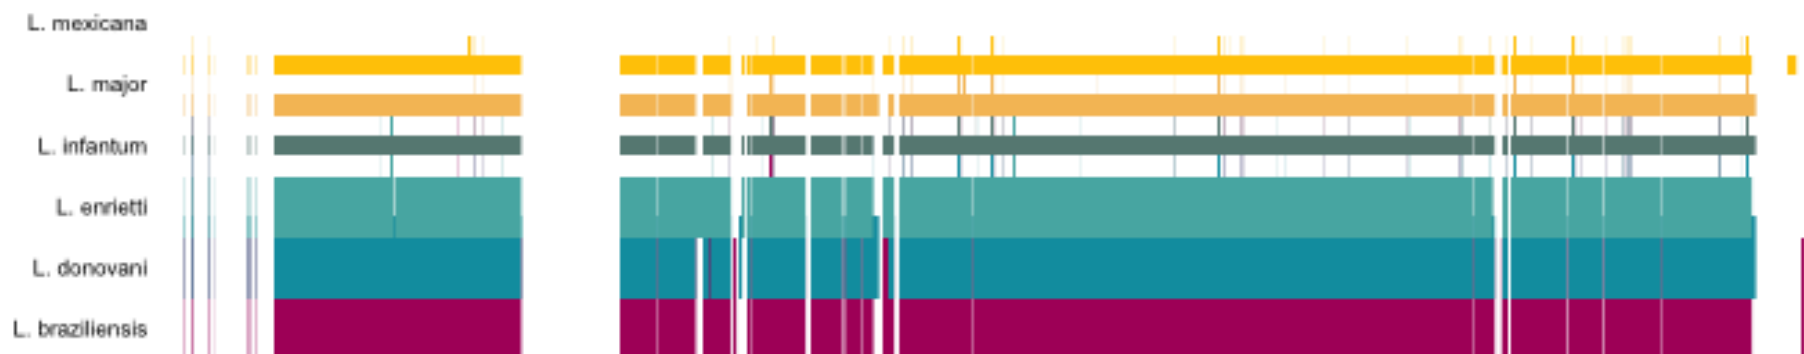

Chr5

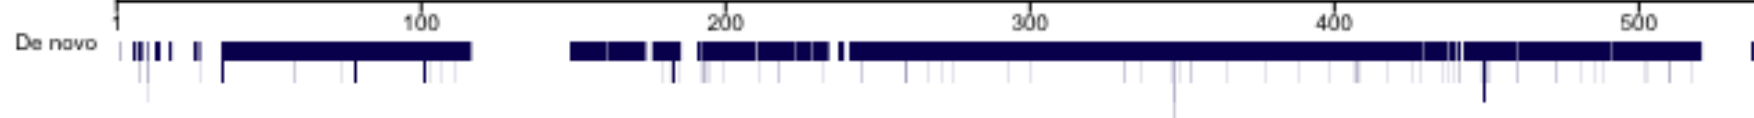

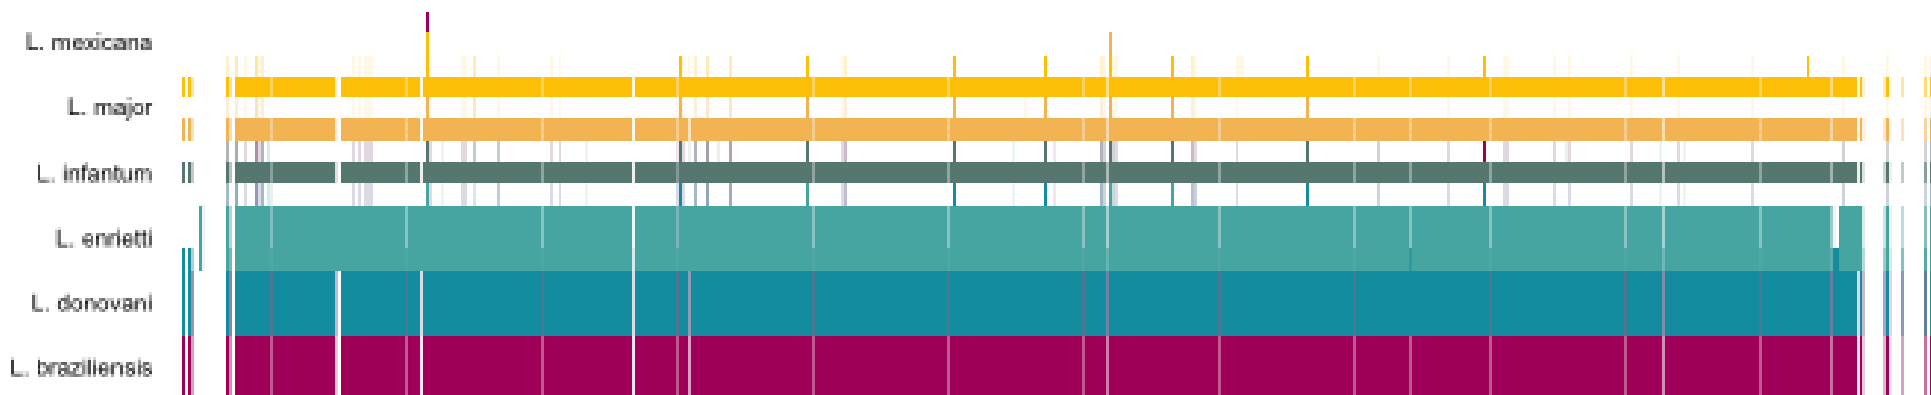

Chr6

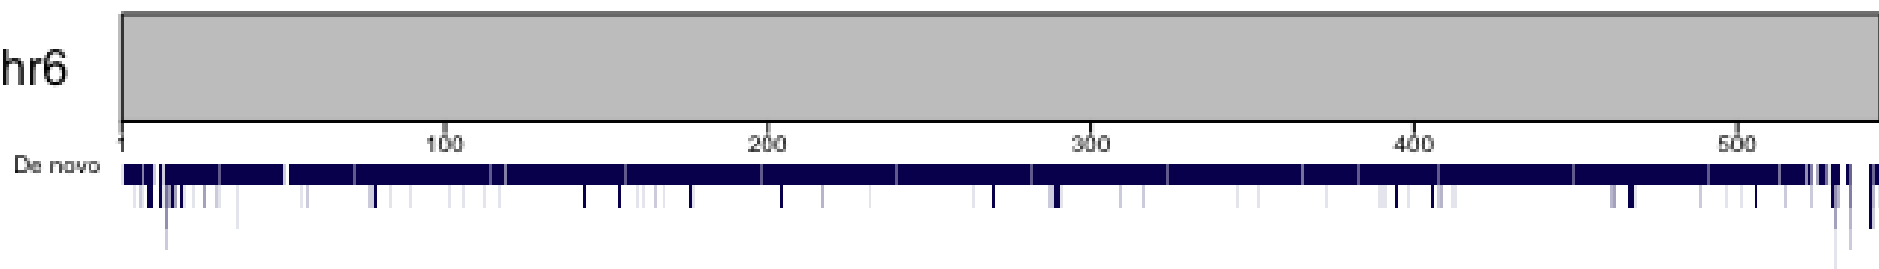

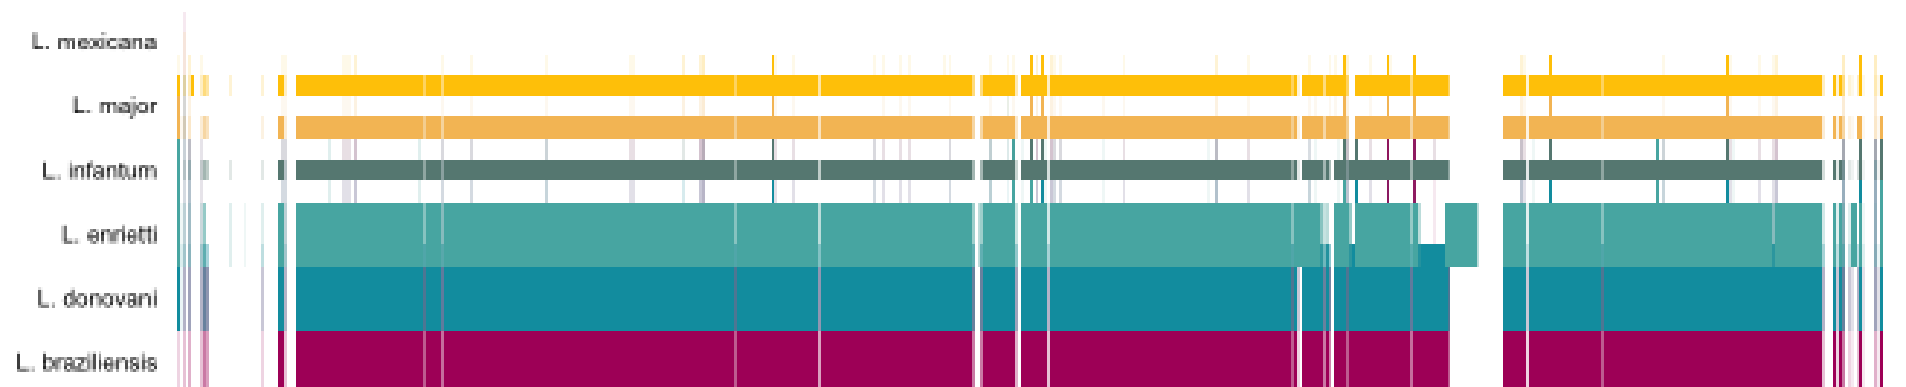

Chr7

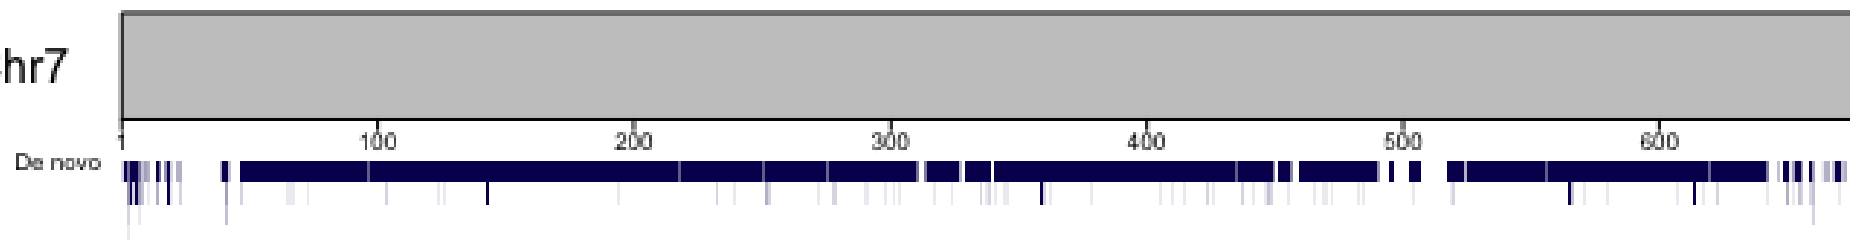

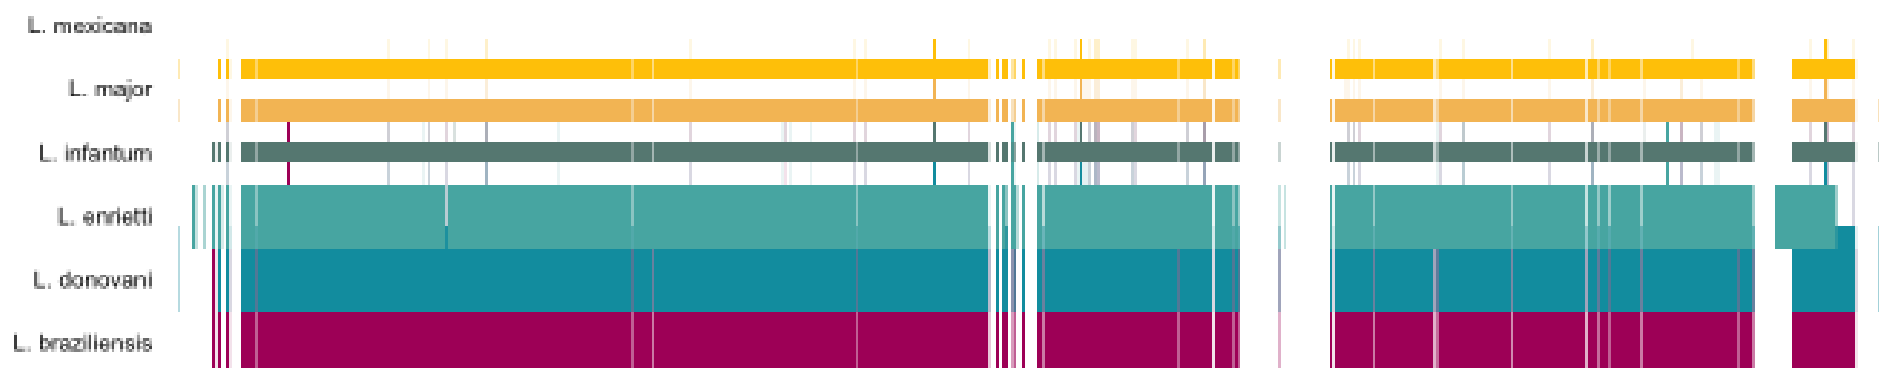

Chr8

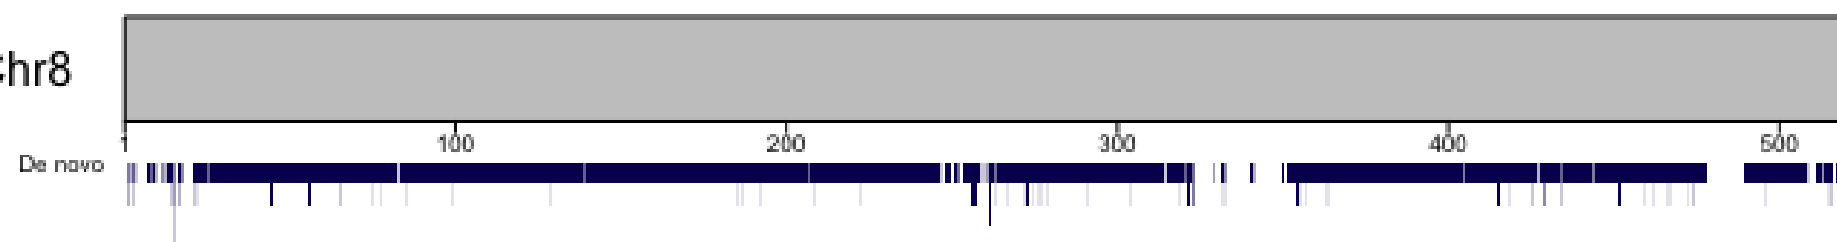



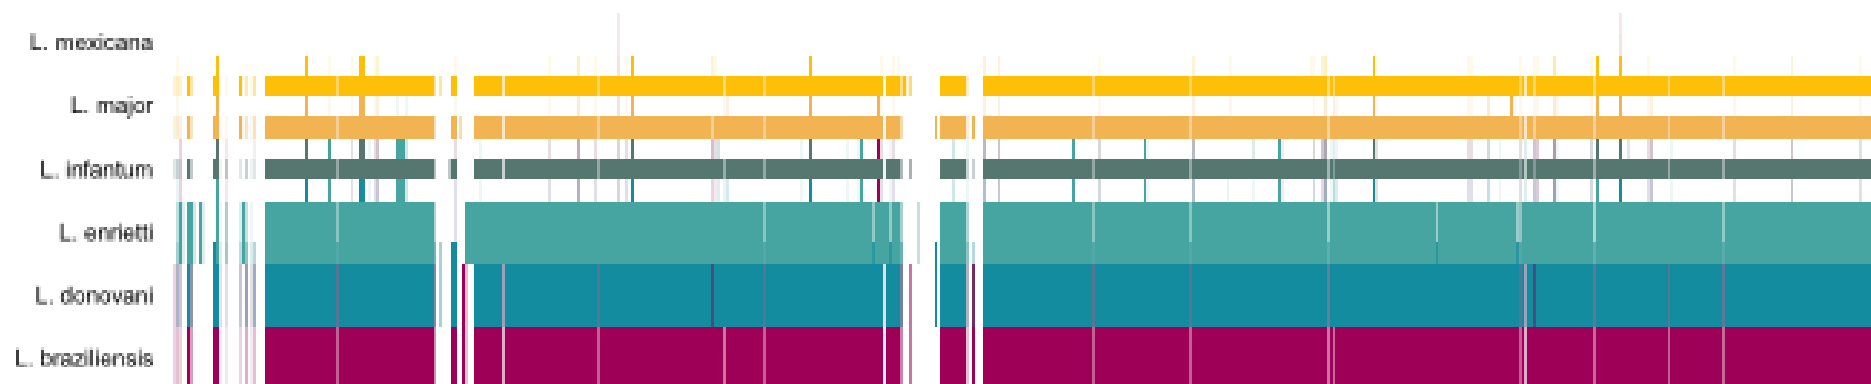

Chr9

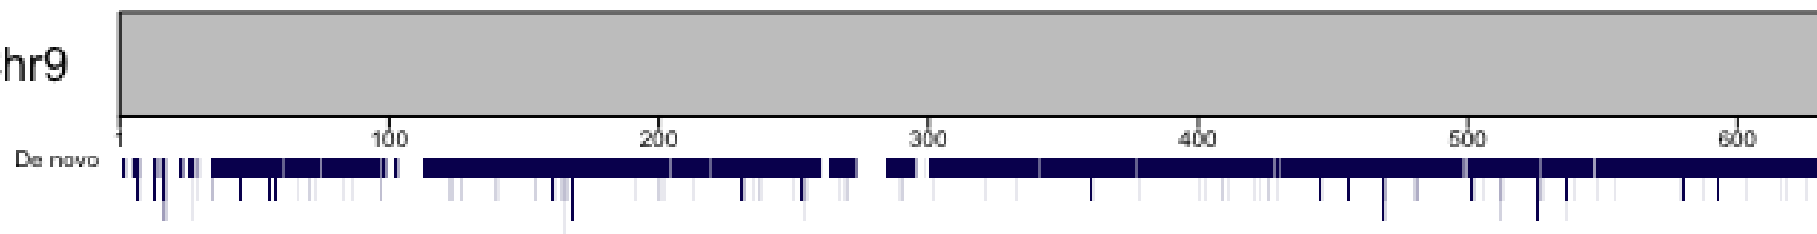

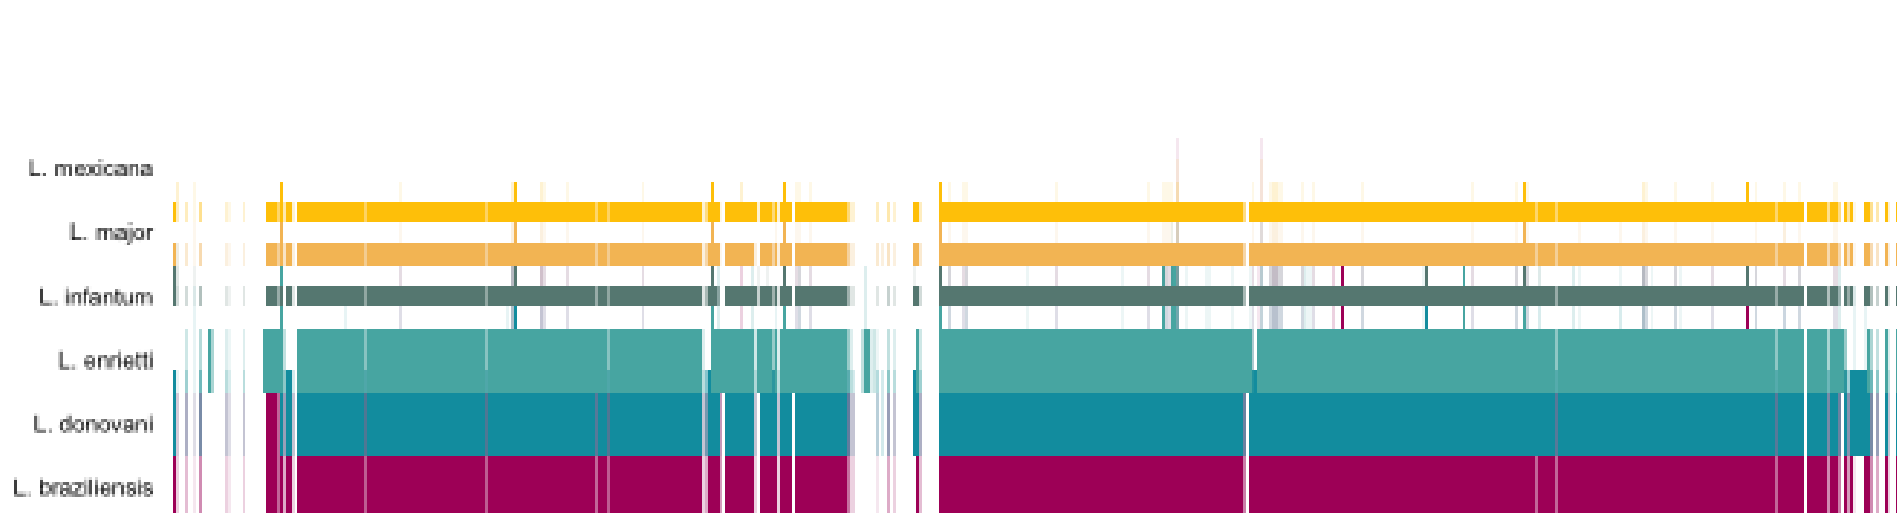

Chr10

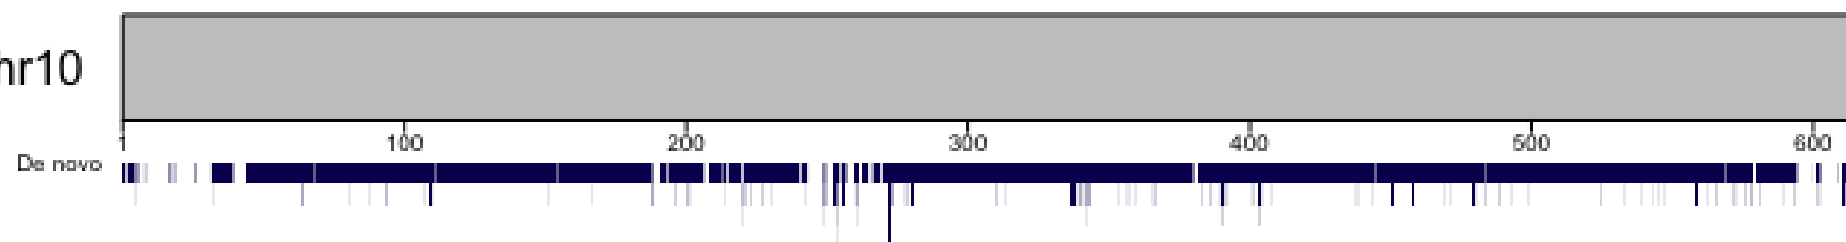

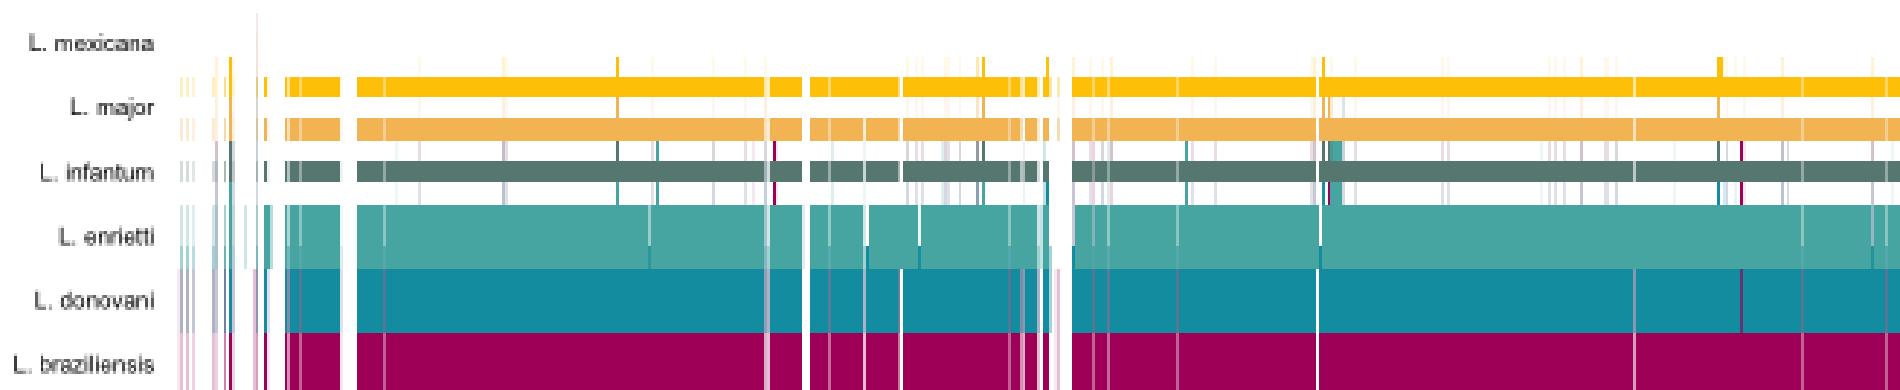

Chr11

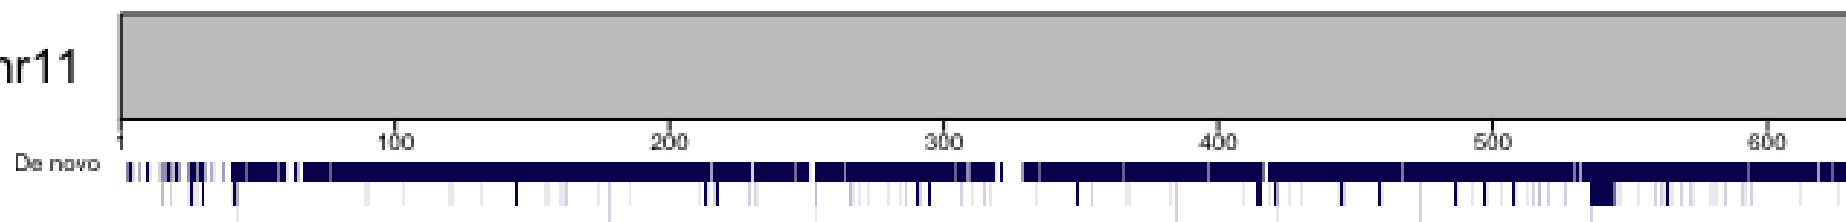

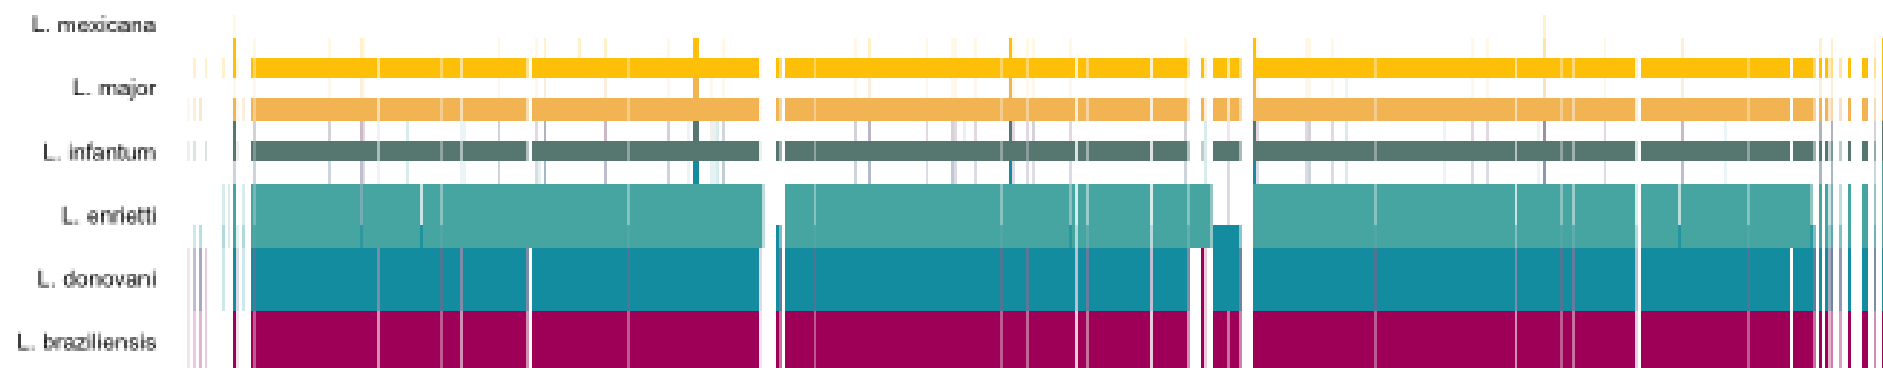

Chr12

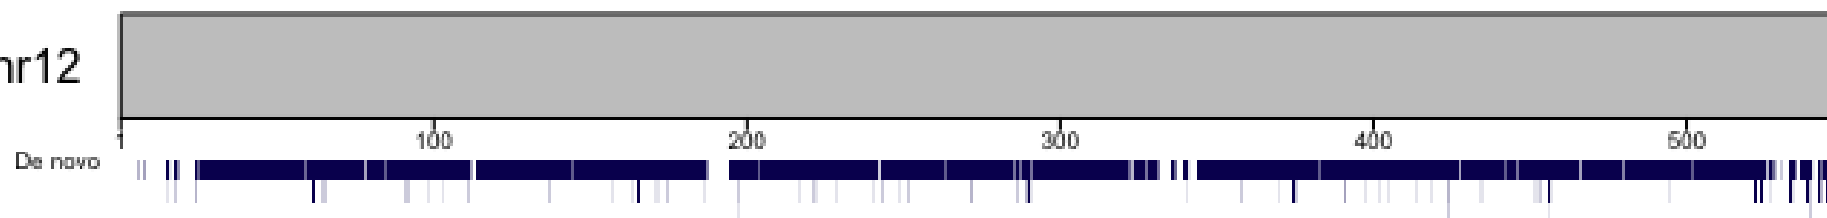

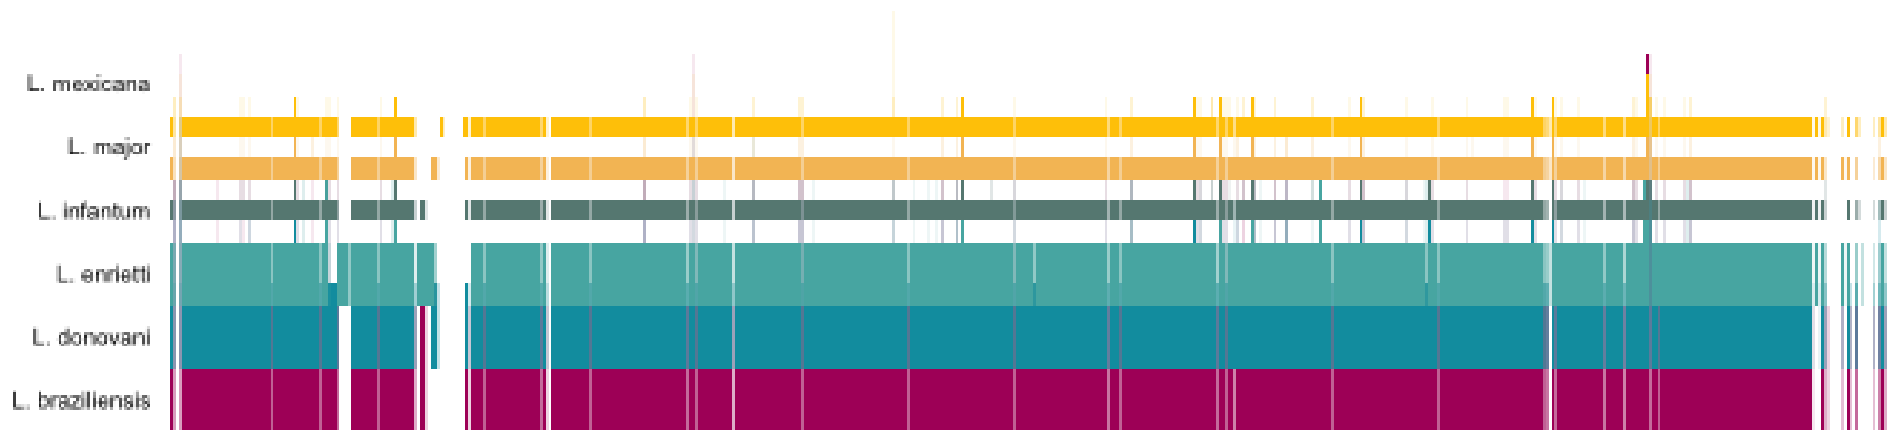

Chr13

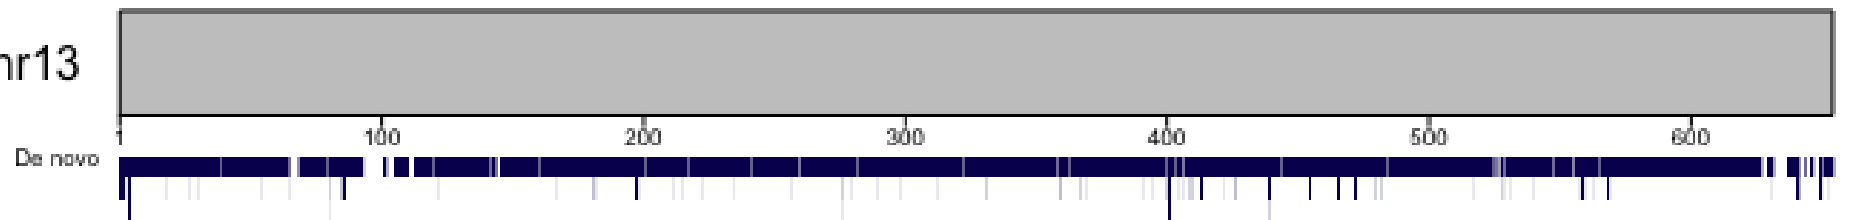

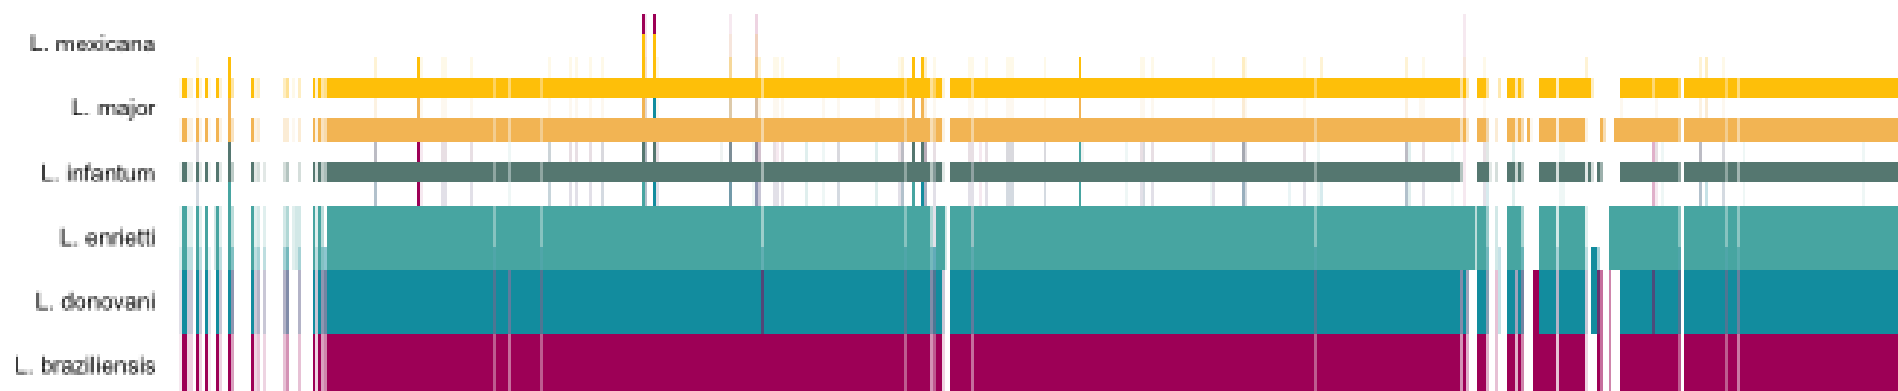

Chr14

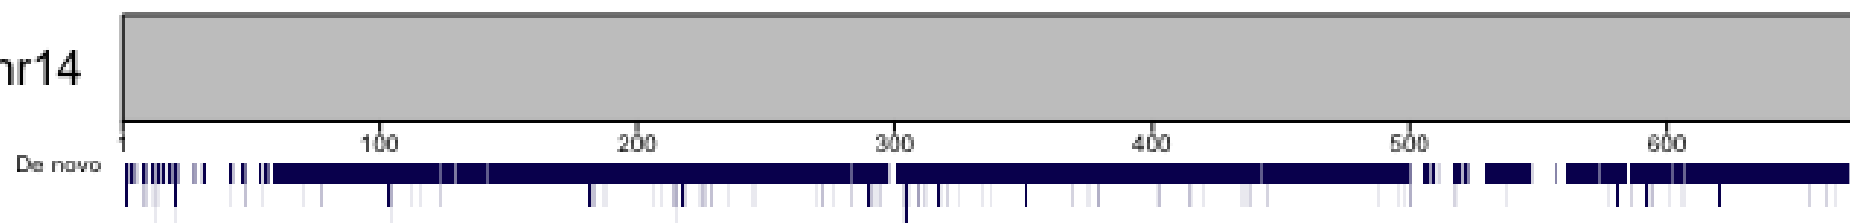

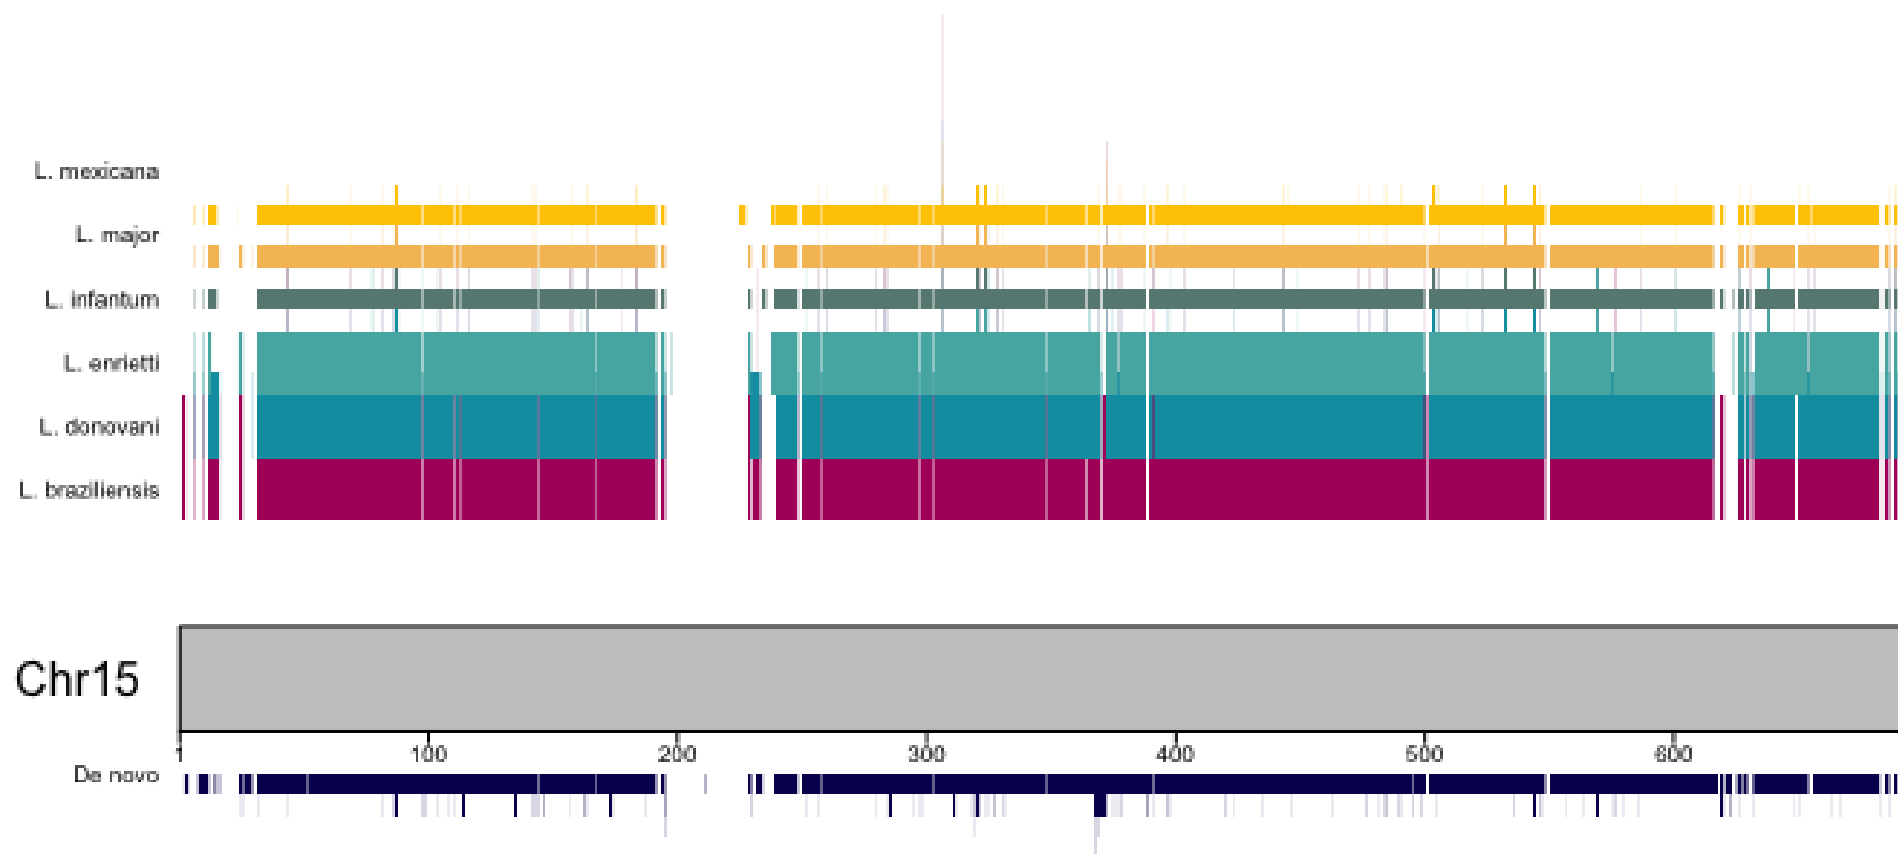

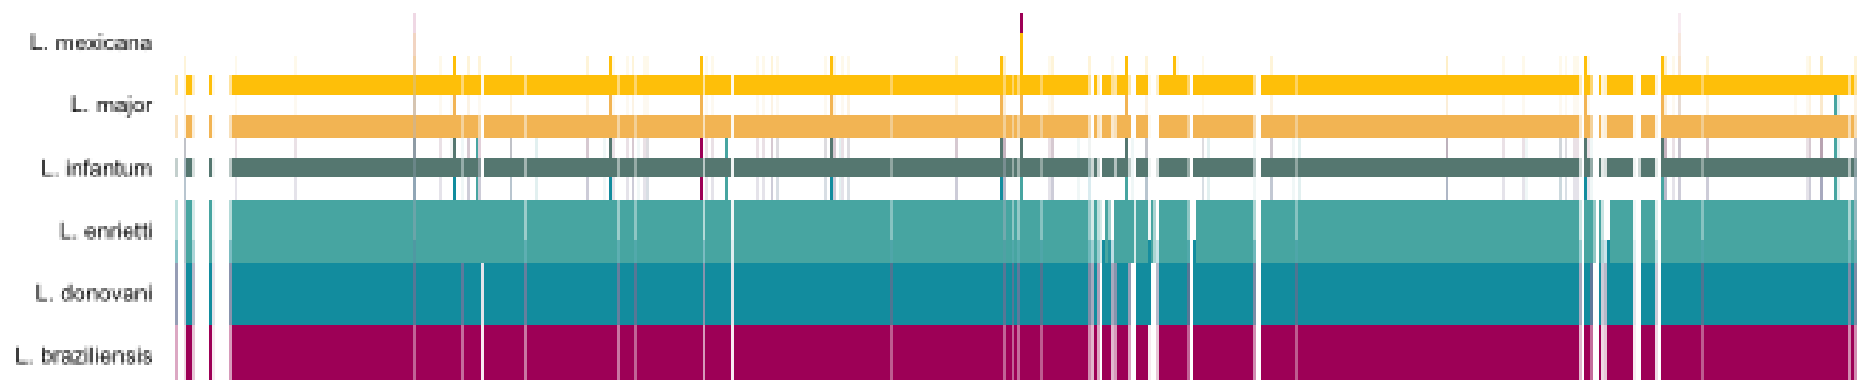

Chr16

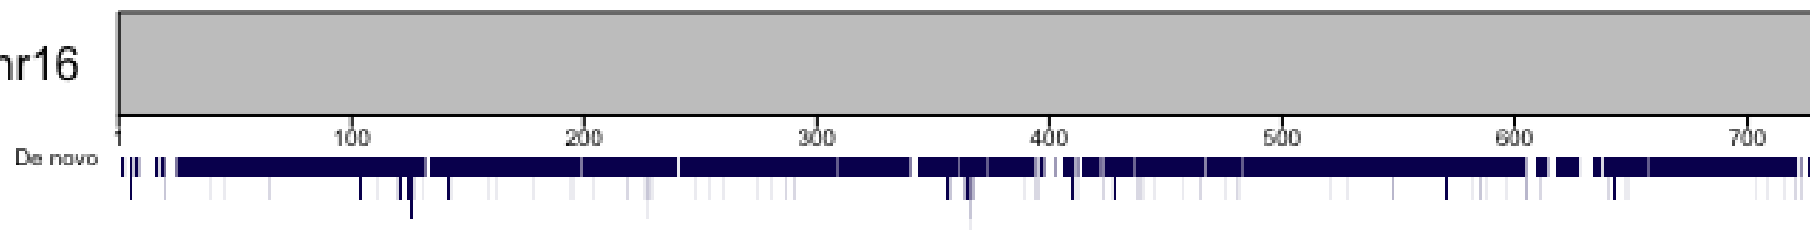



*L. mexicana*

*L. major*

*L. infantum*

*L. enrietti*

*L. donovani*

*L. braziliensis*

Chr17

De novo

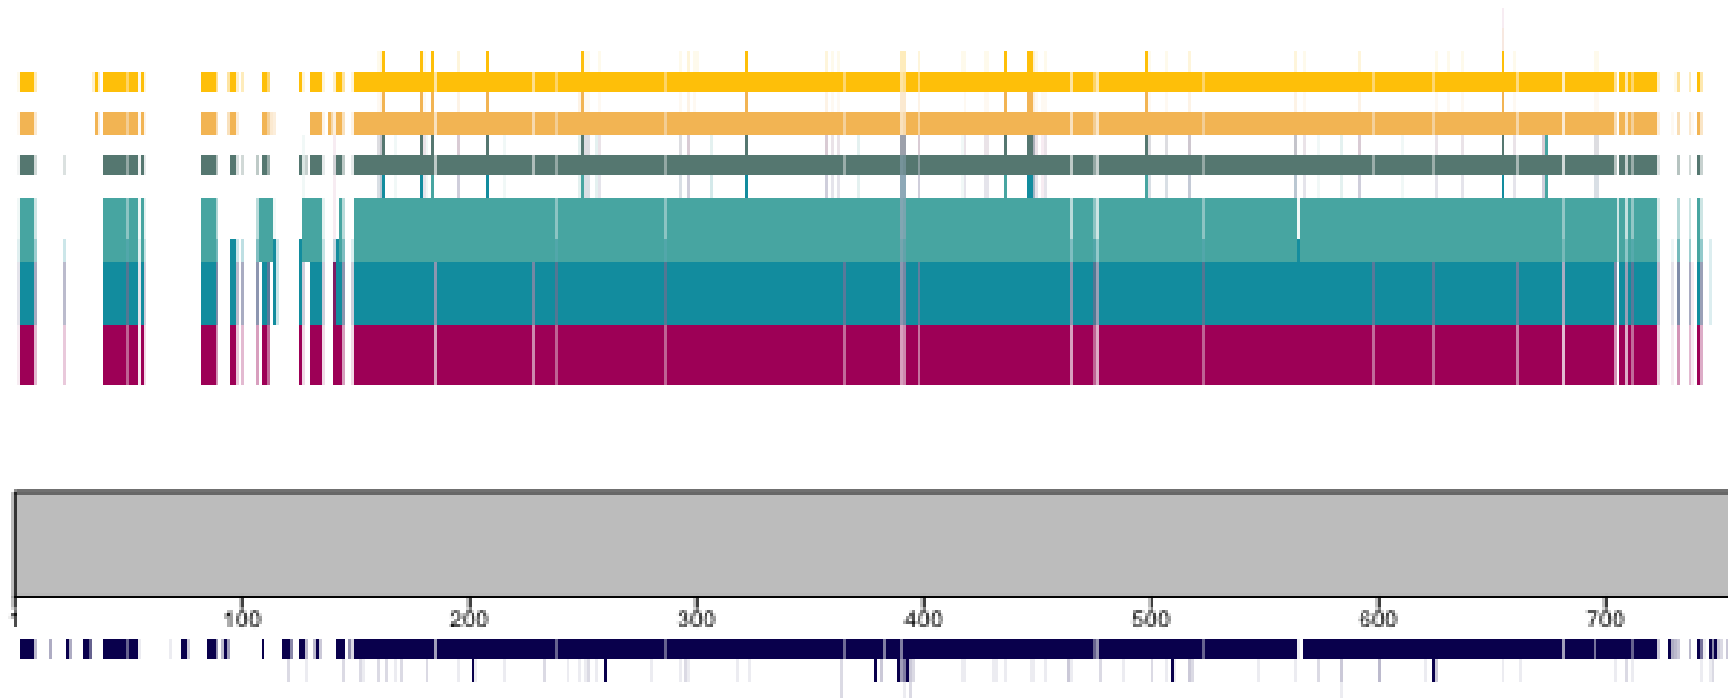

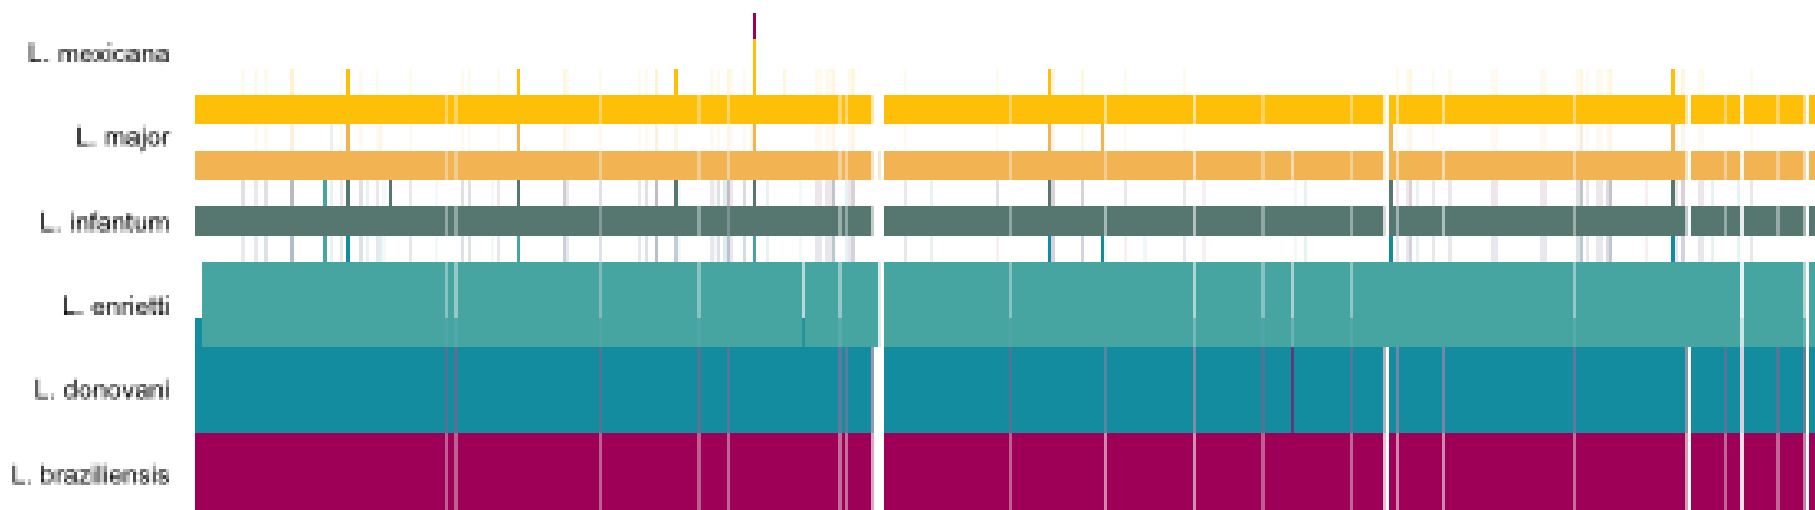

Chr18

De novo

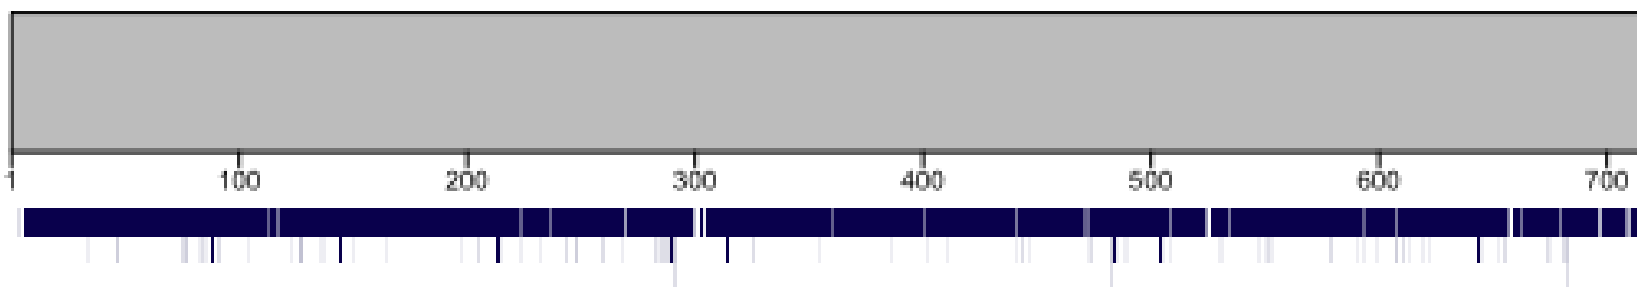

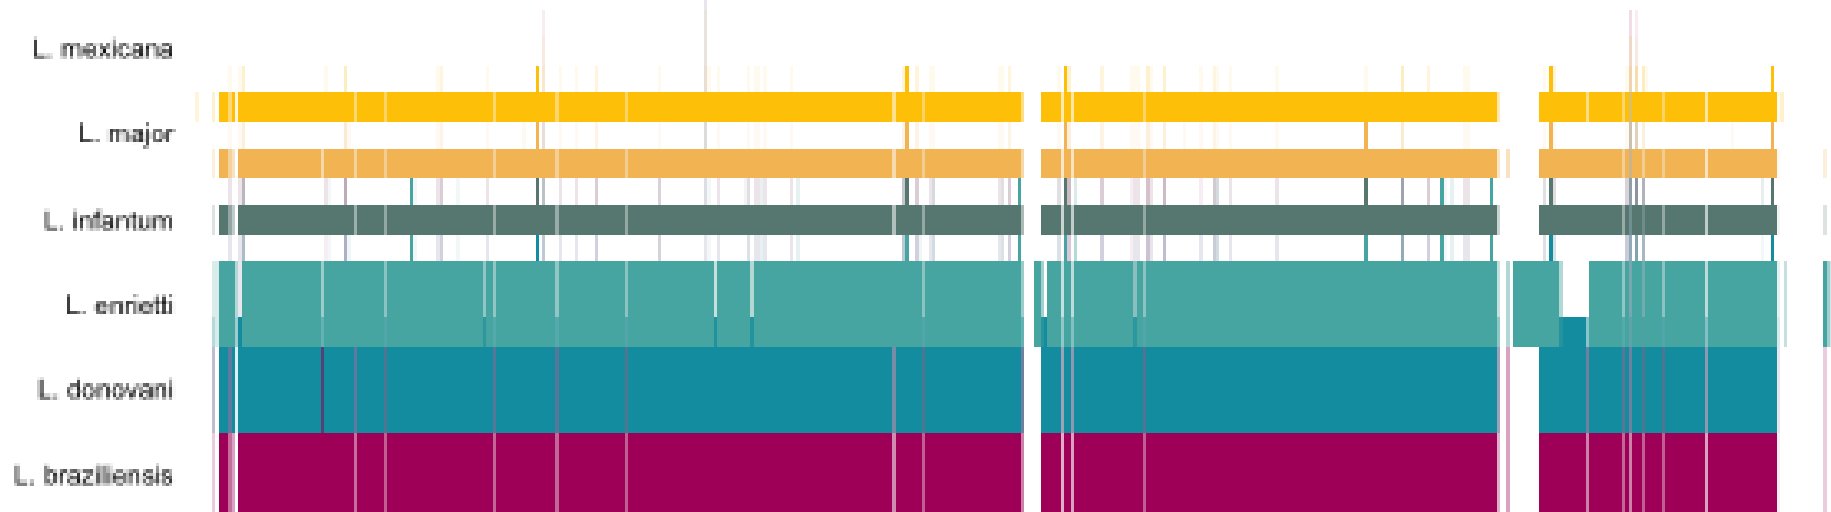

Chr19

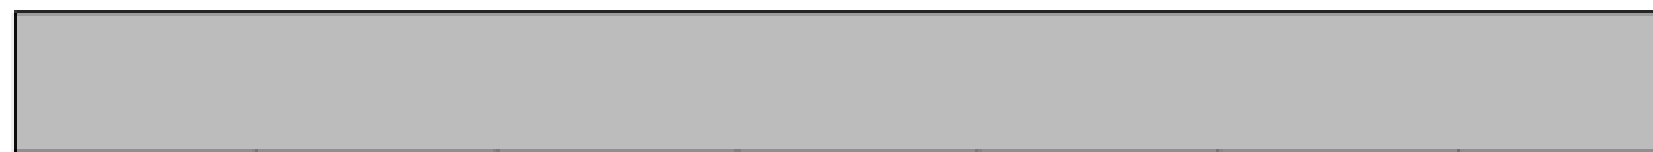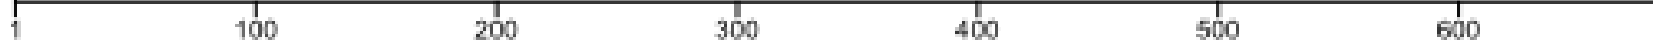

De novo

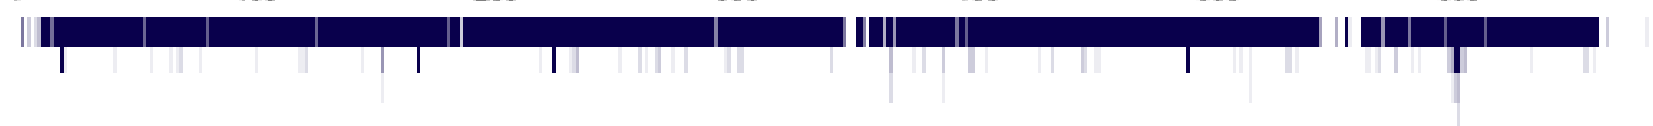

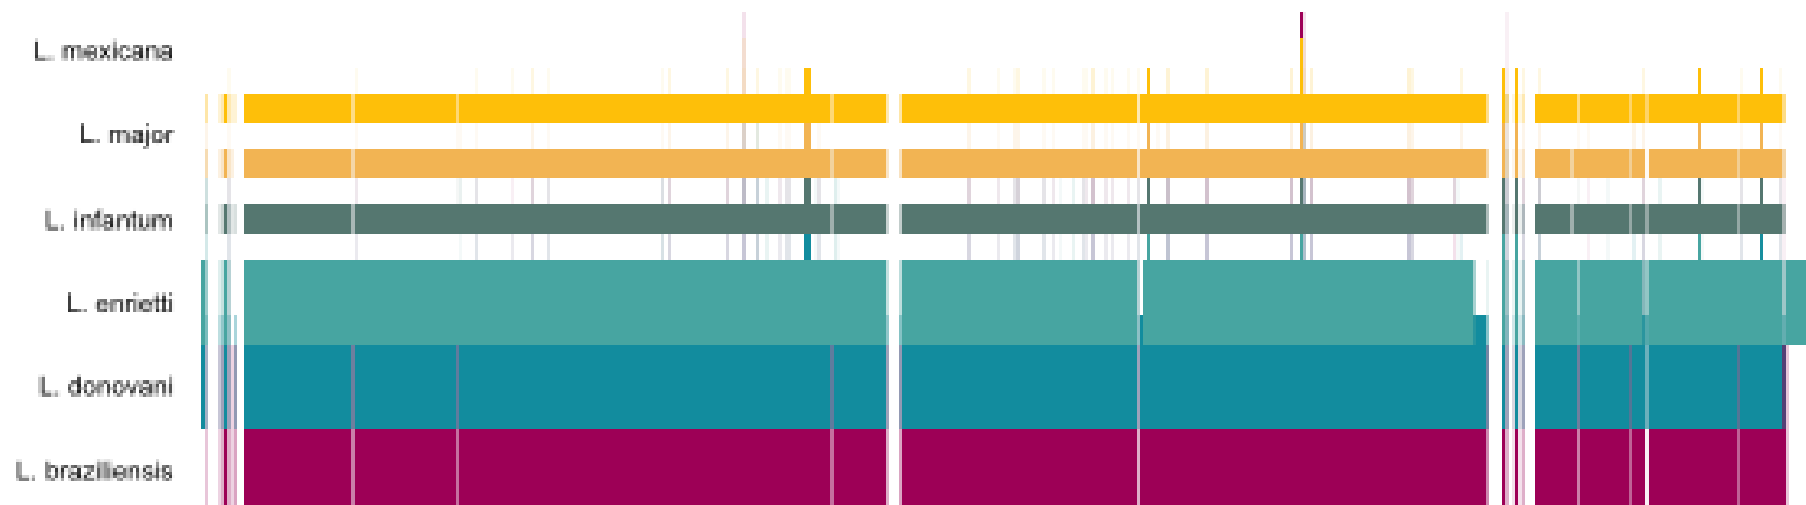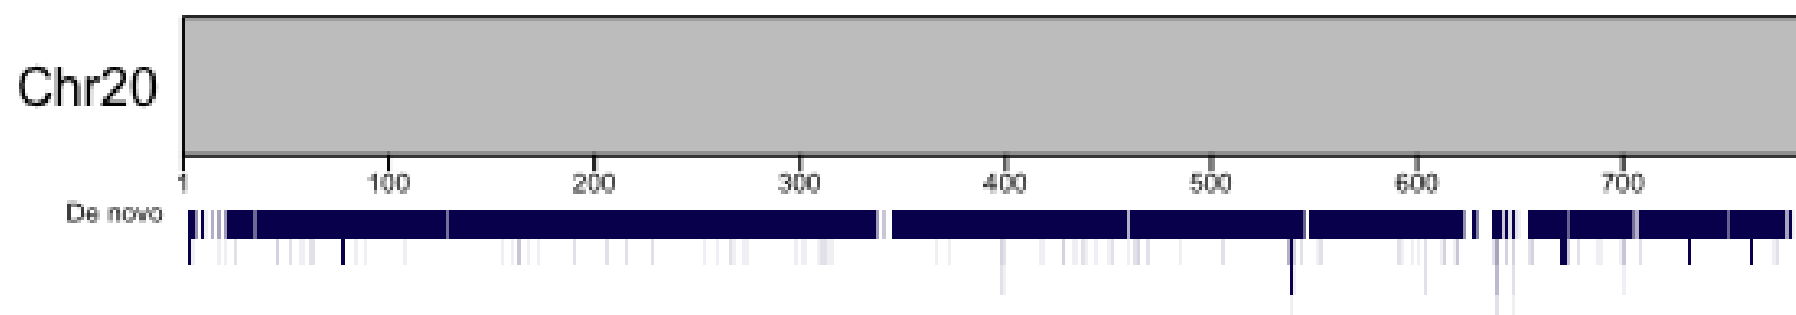

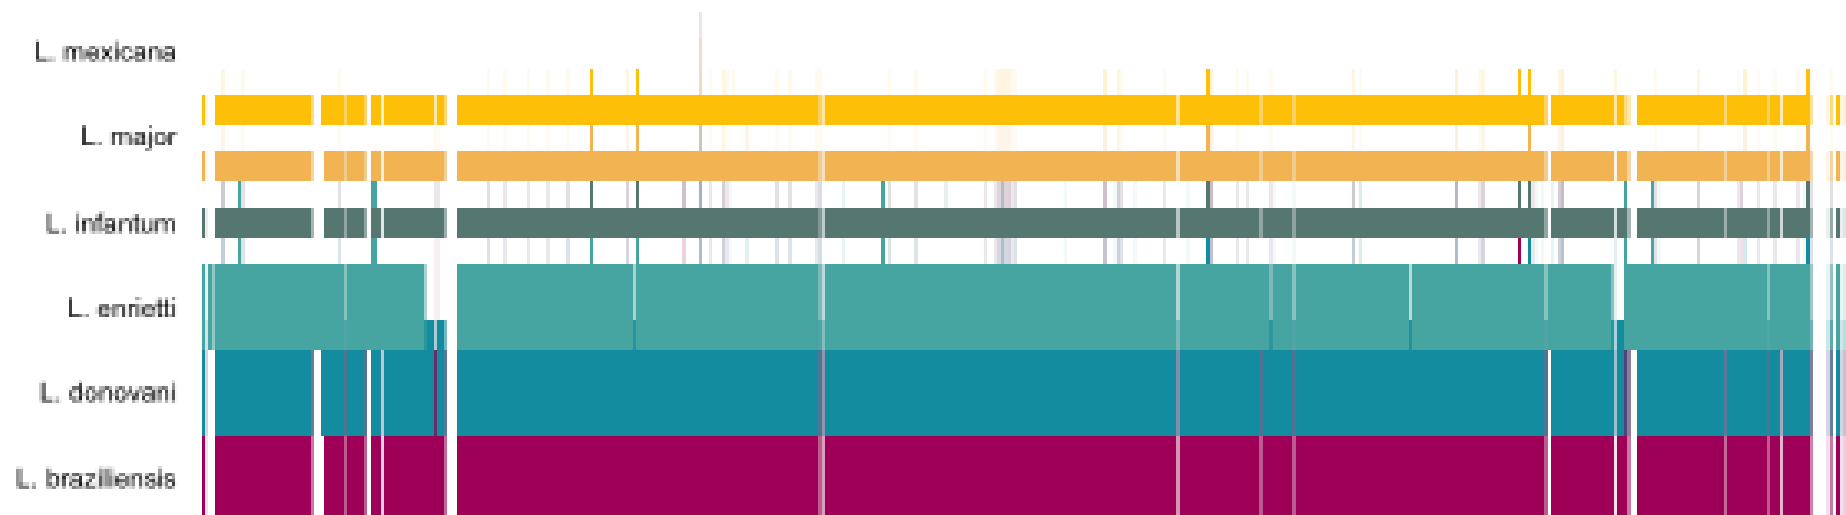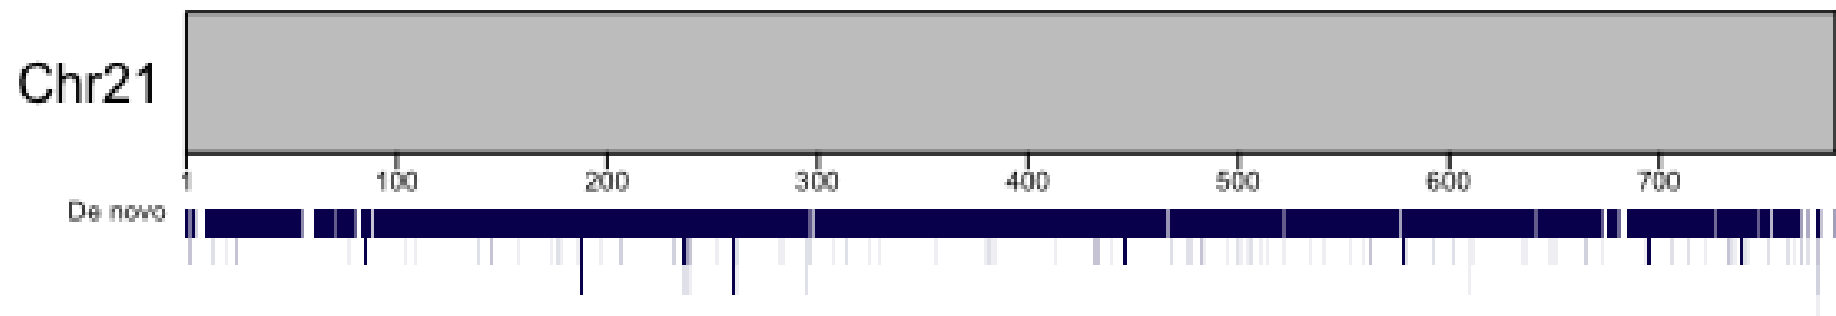

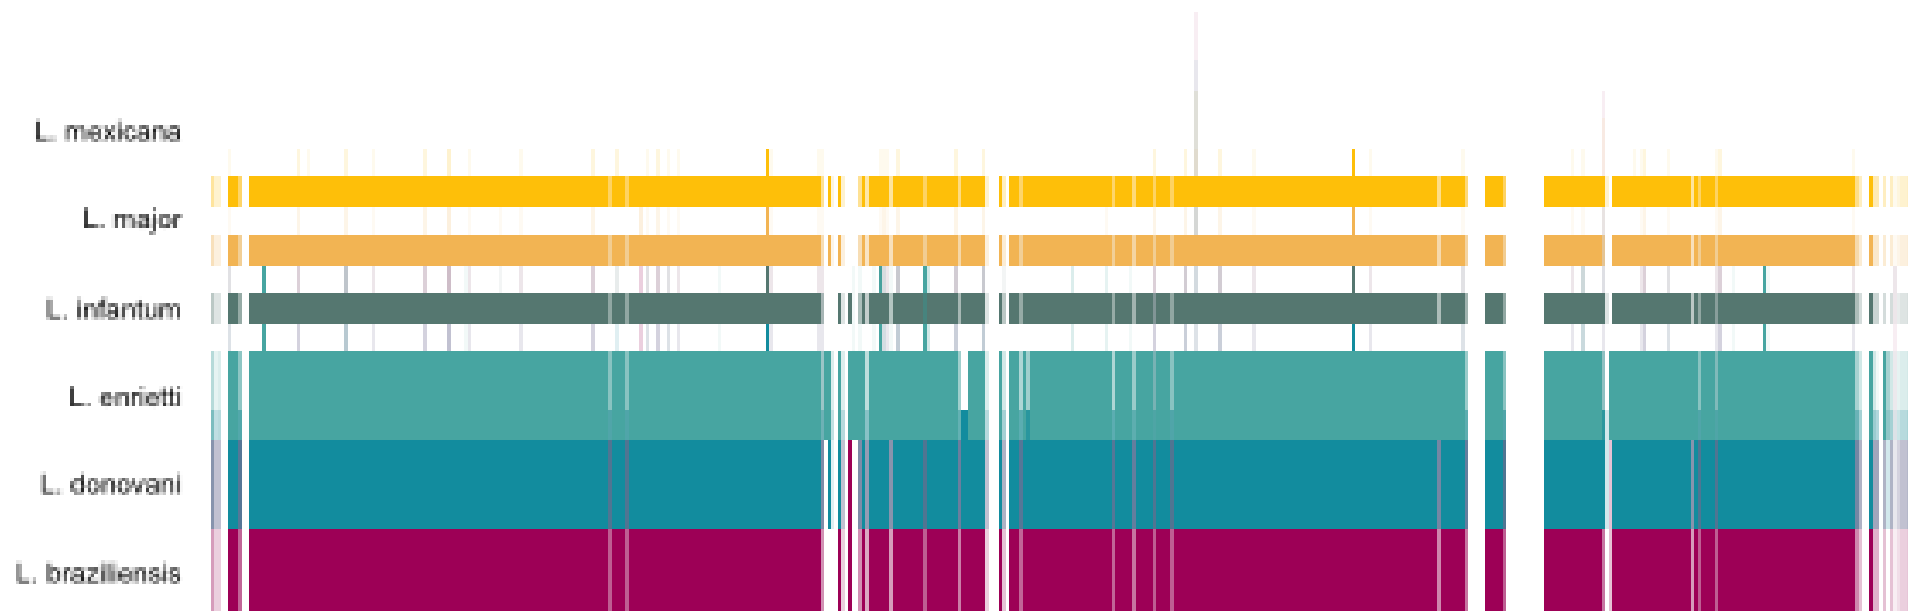

Chr22

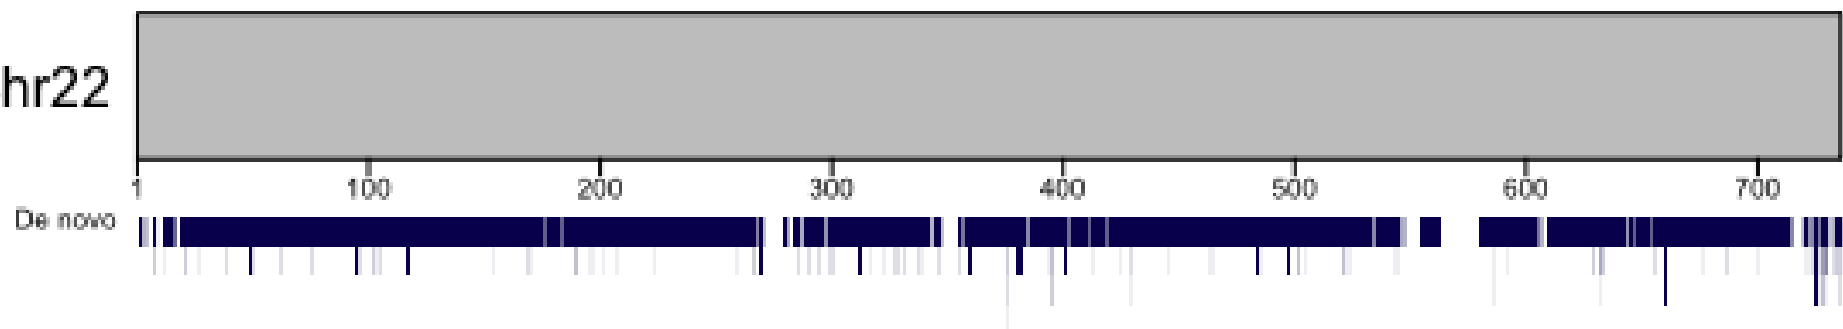

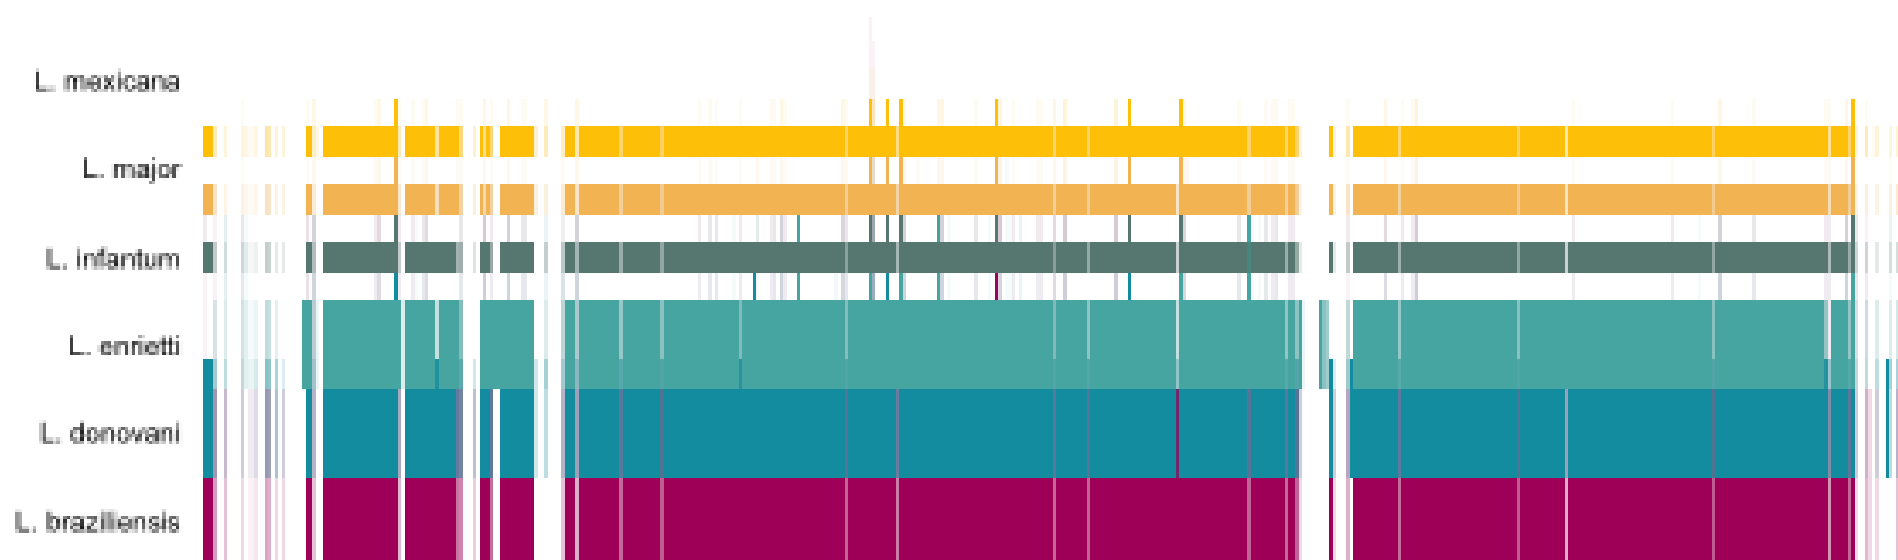

Chr23

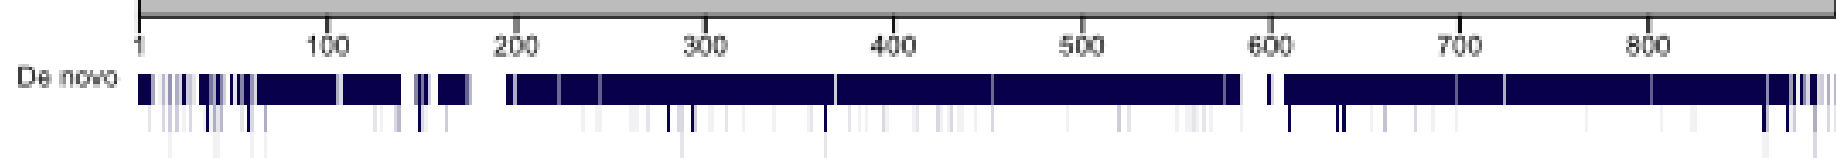

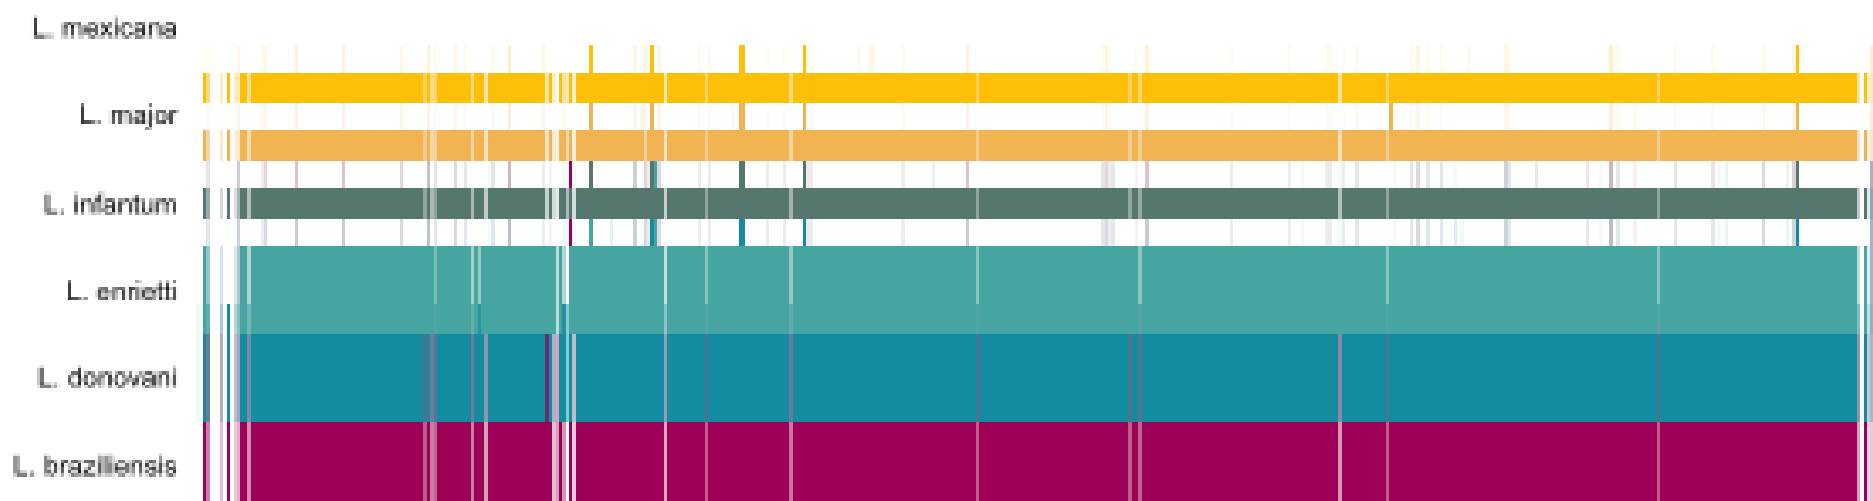

Chr24

De novo

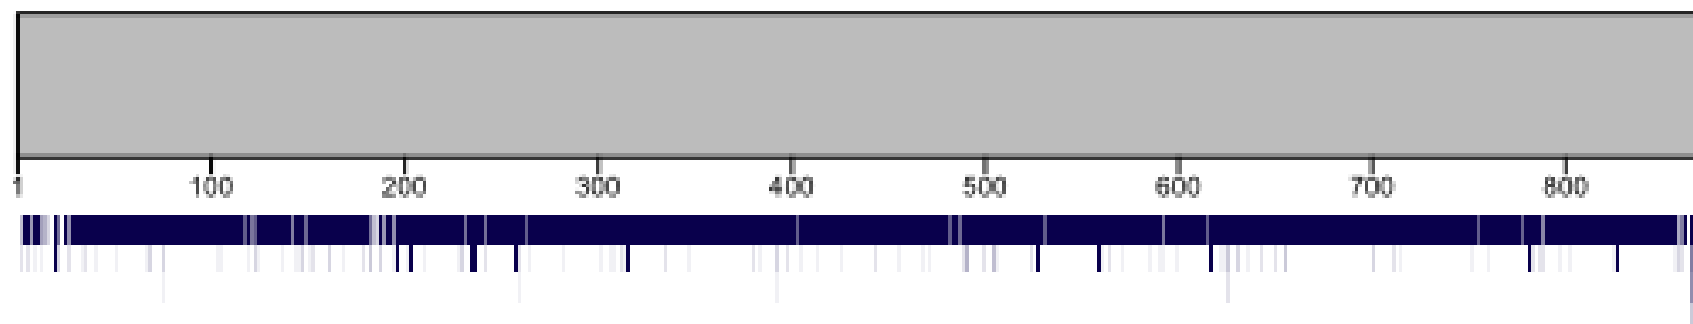



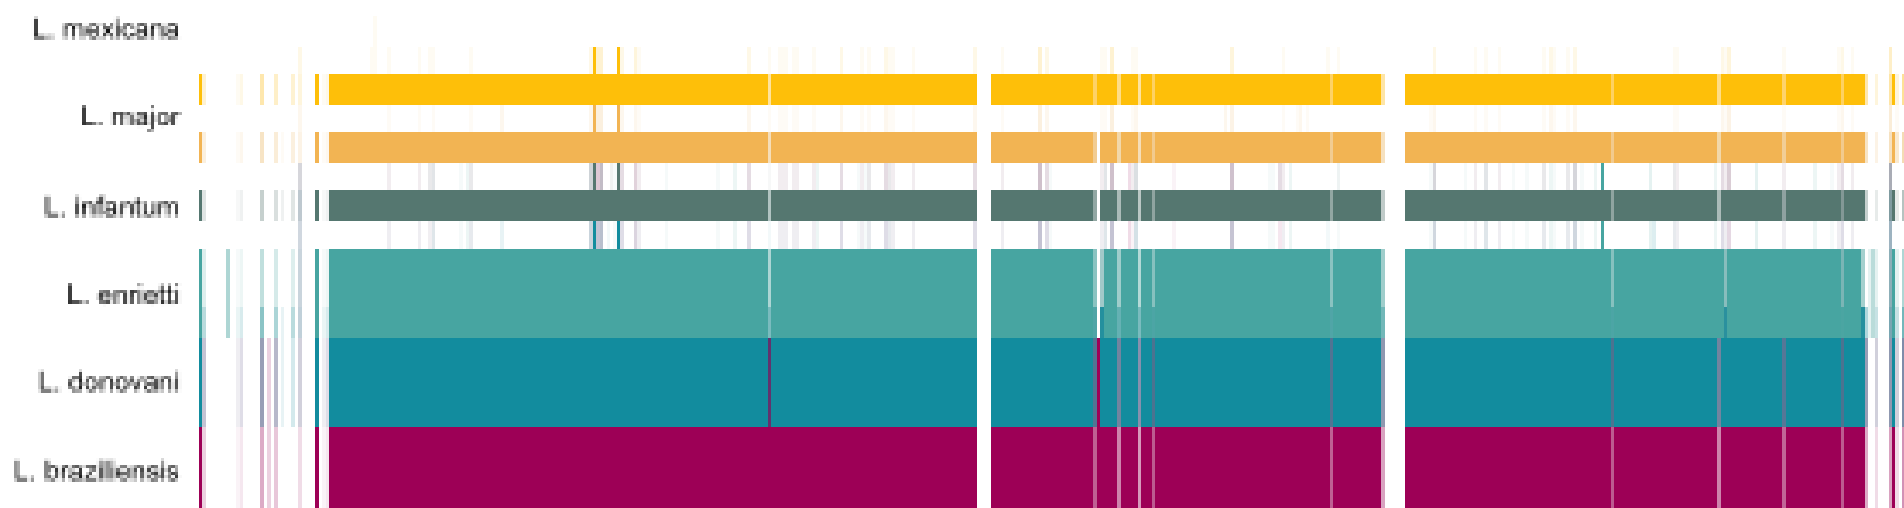

Chr25

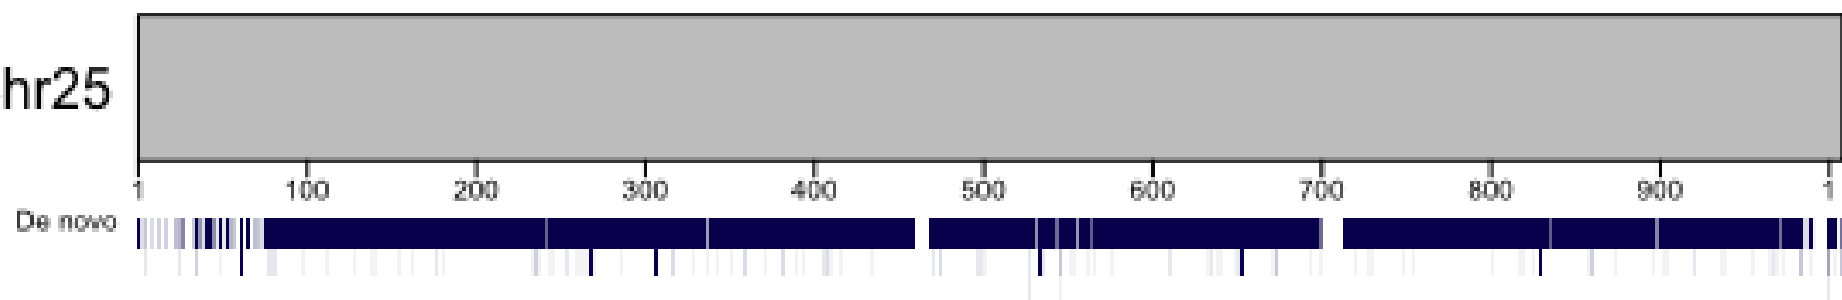



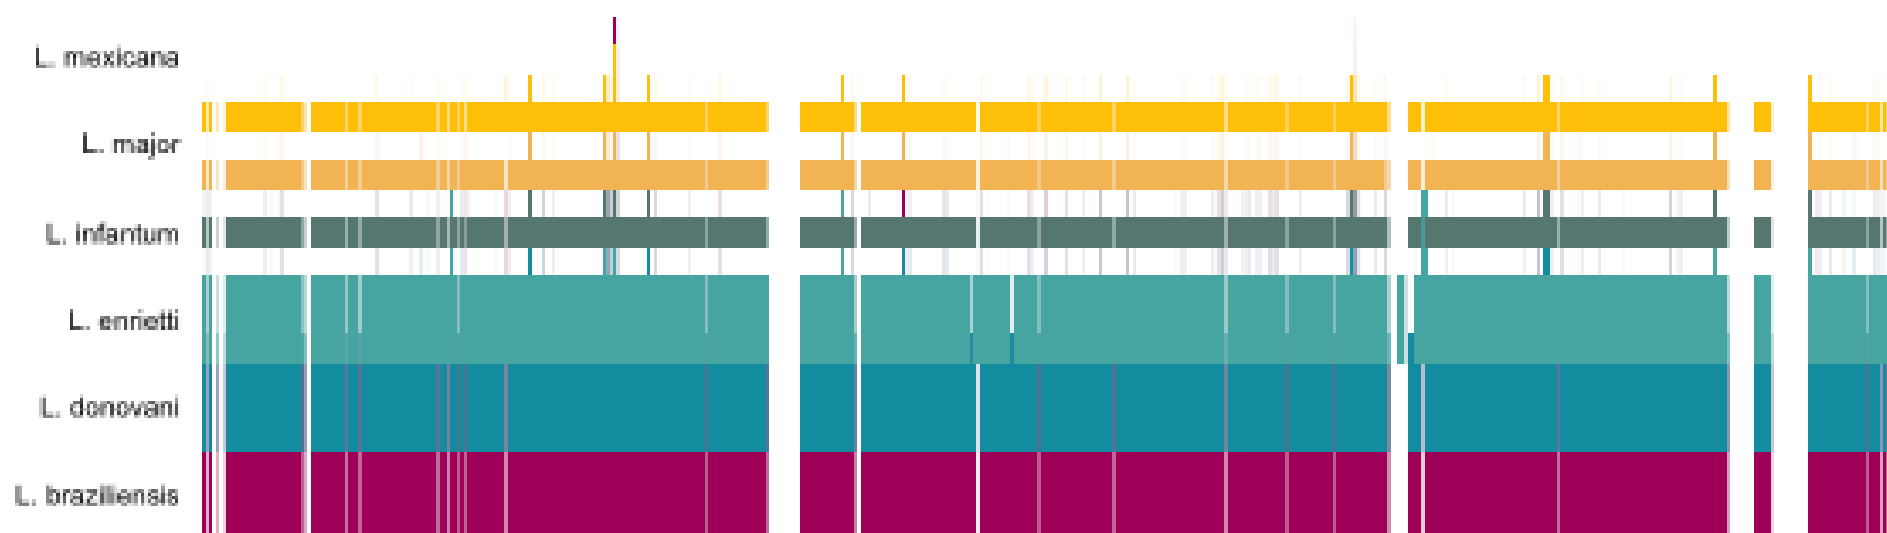

Chr27

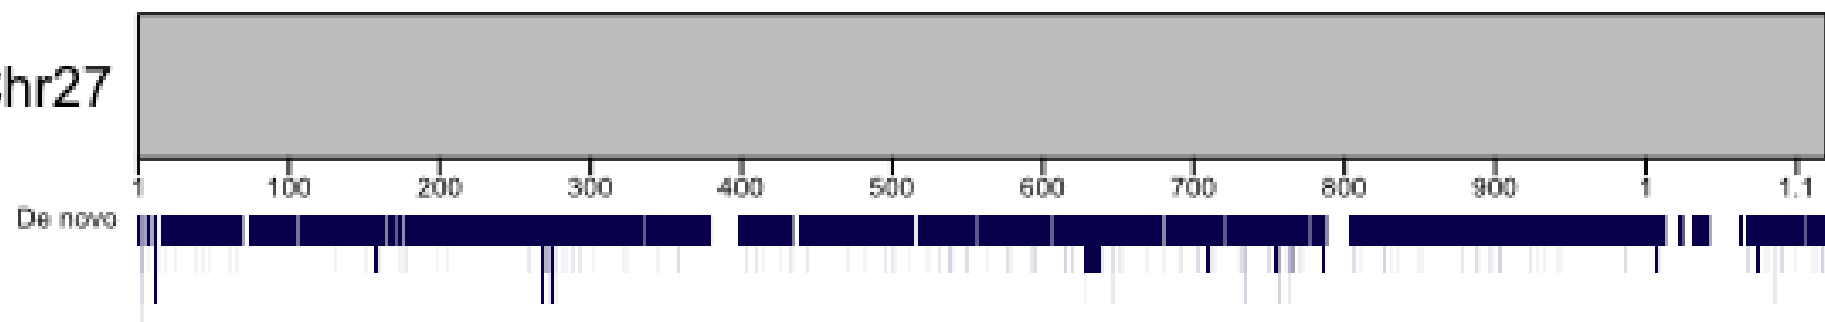

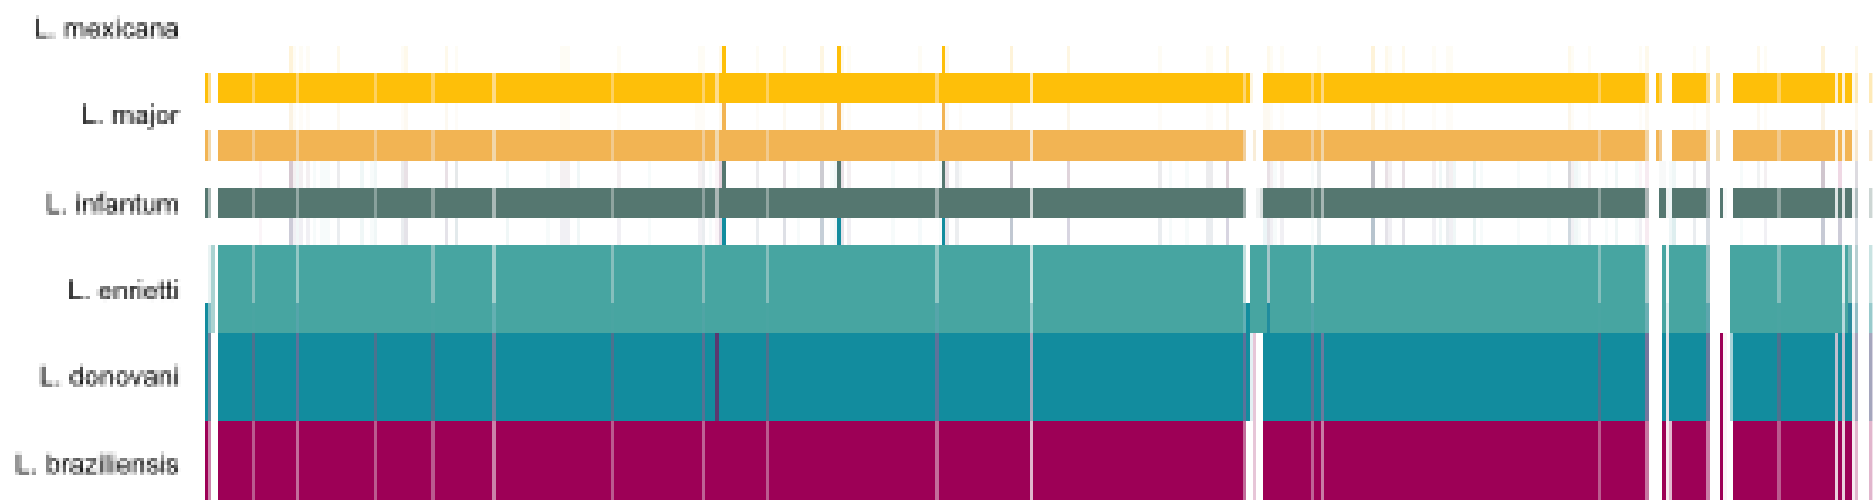

Chr28

De novo

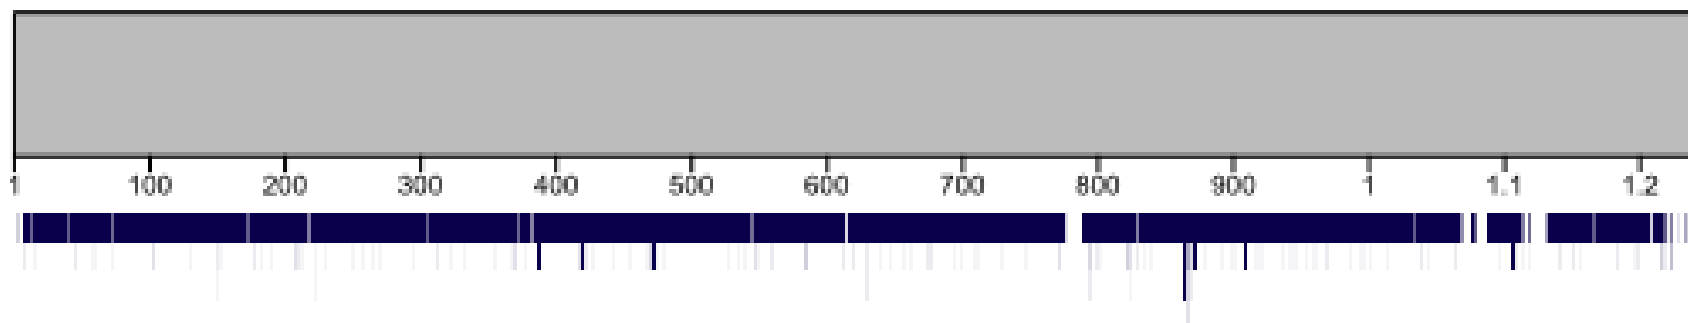

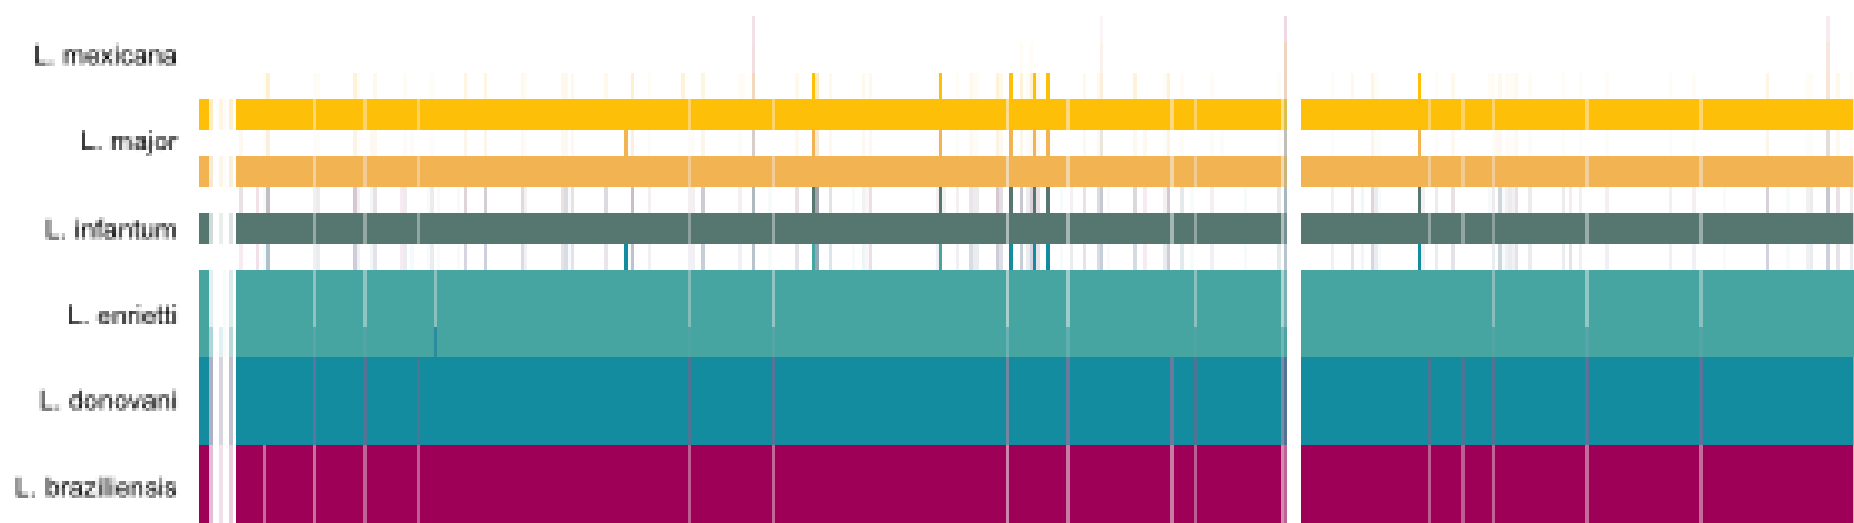

Chr29

De novo

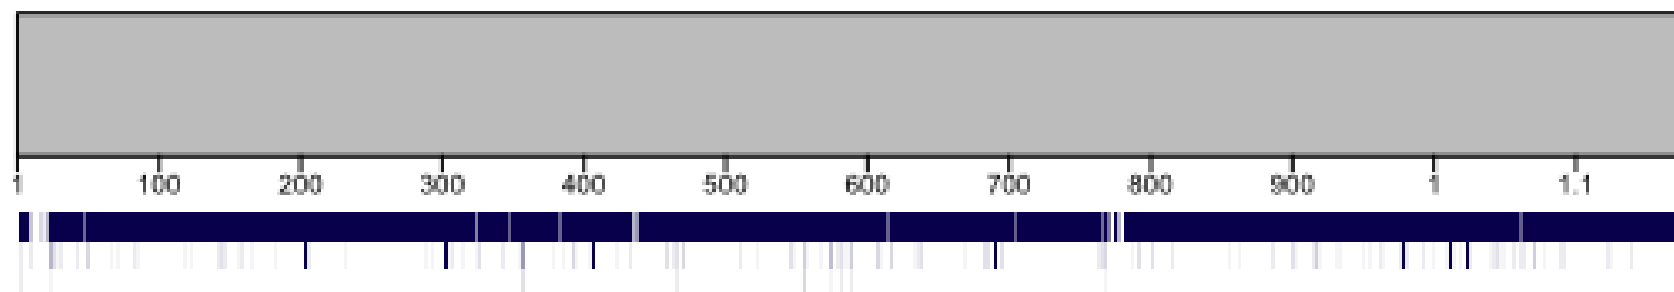

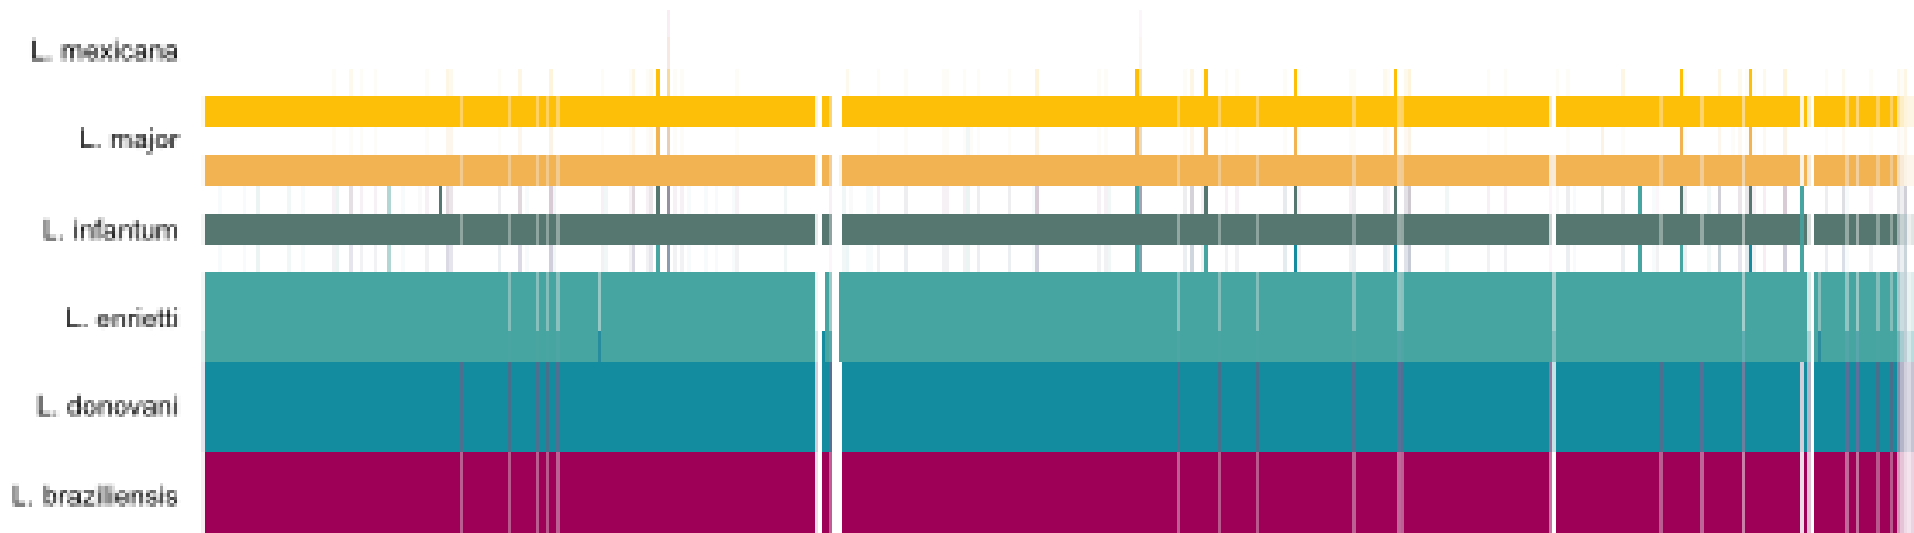

Chr30

De novo

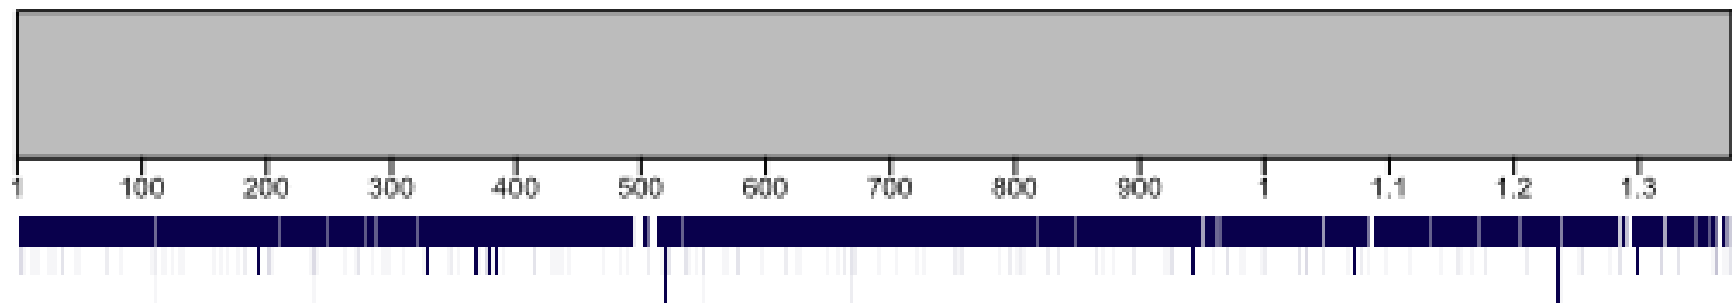

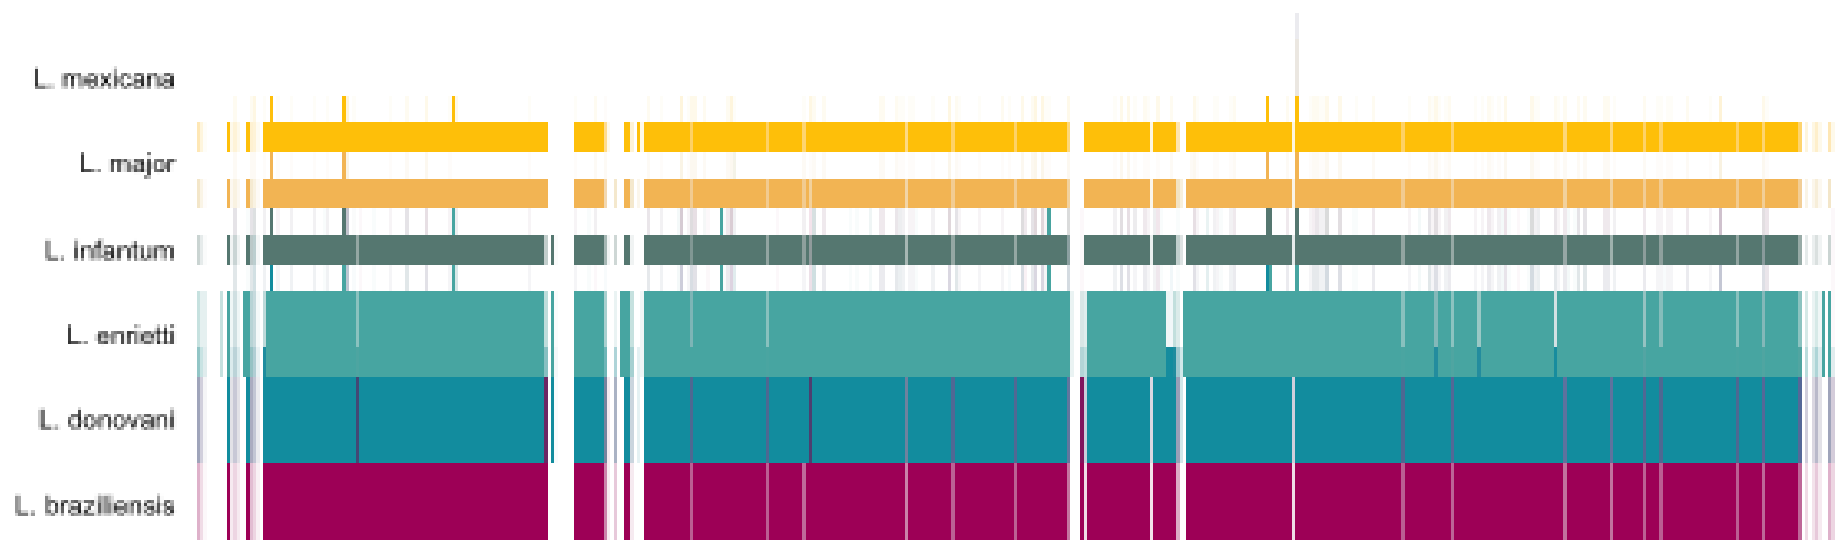

Chr31

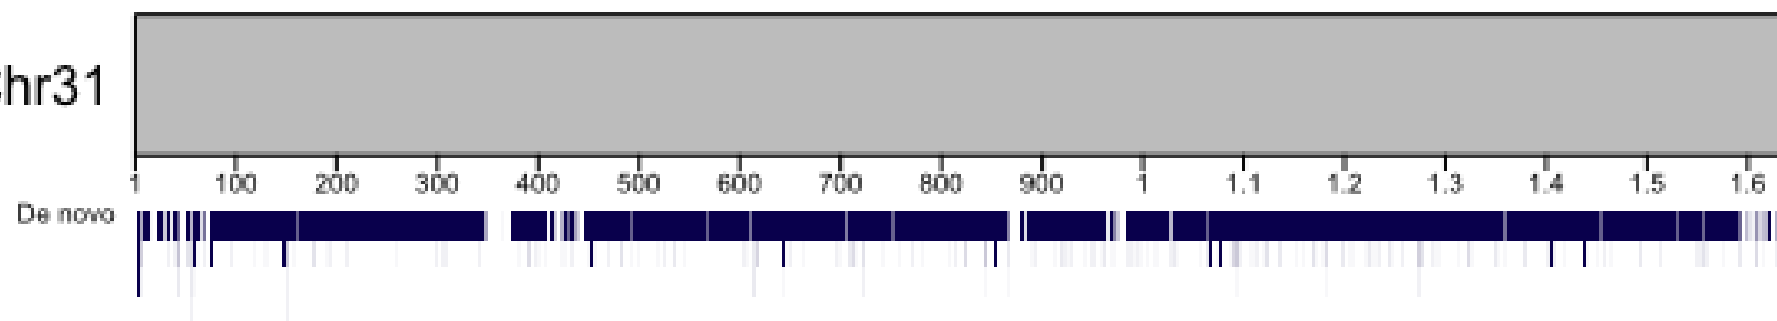

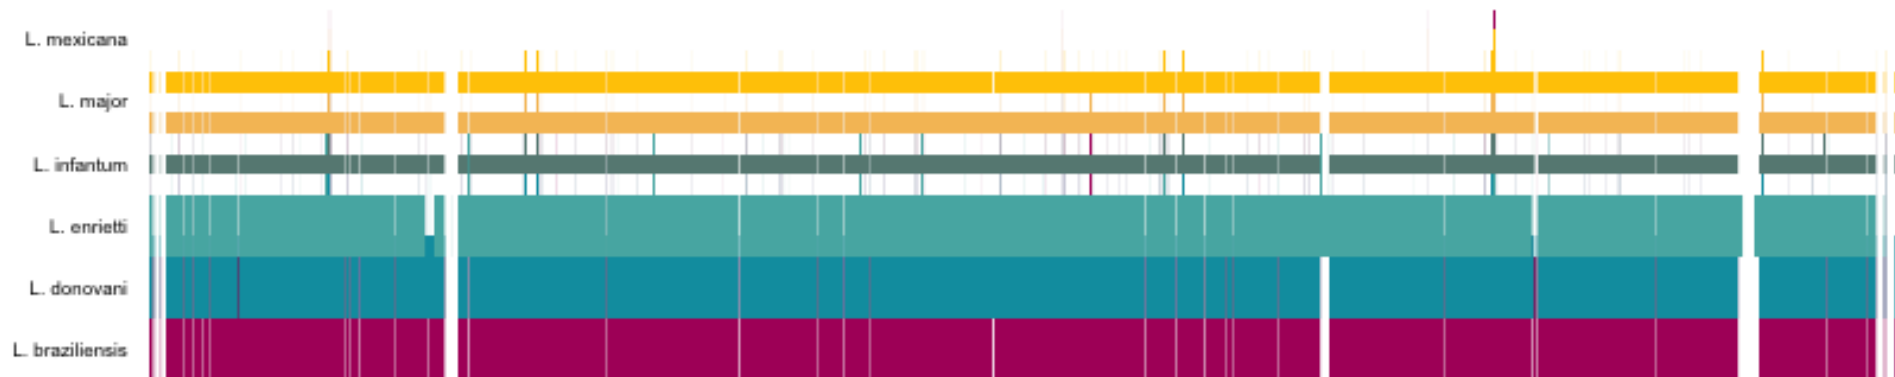

Chr32

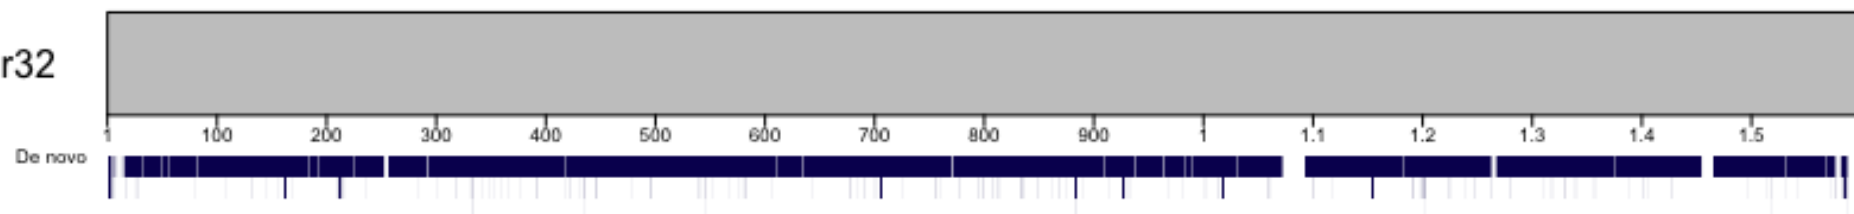



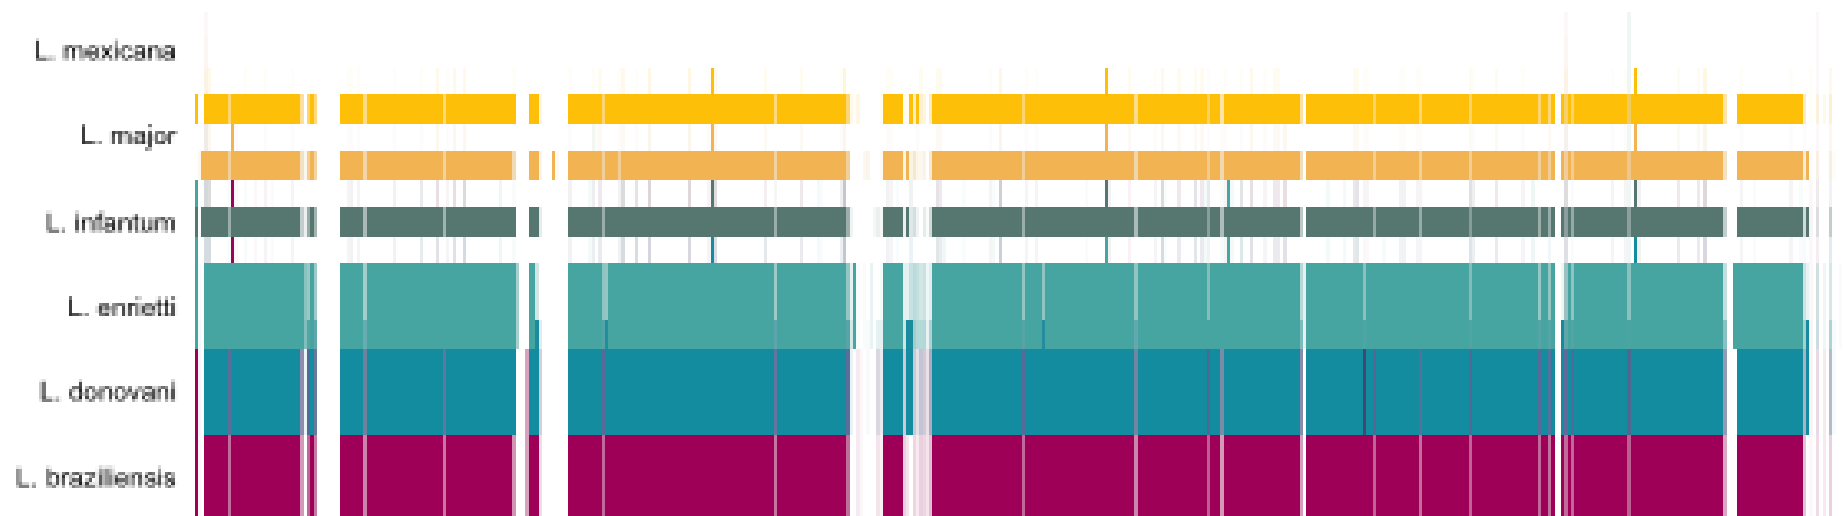

Chr33

De novo

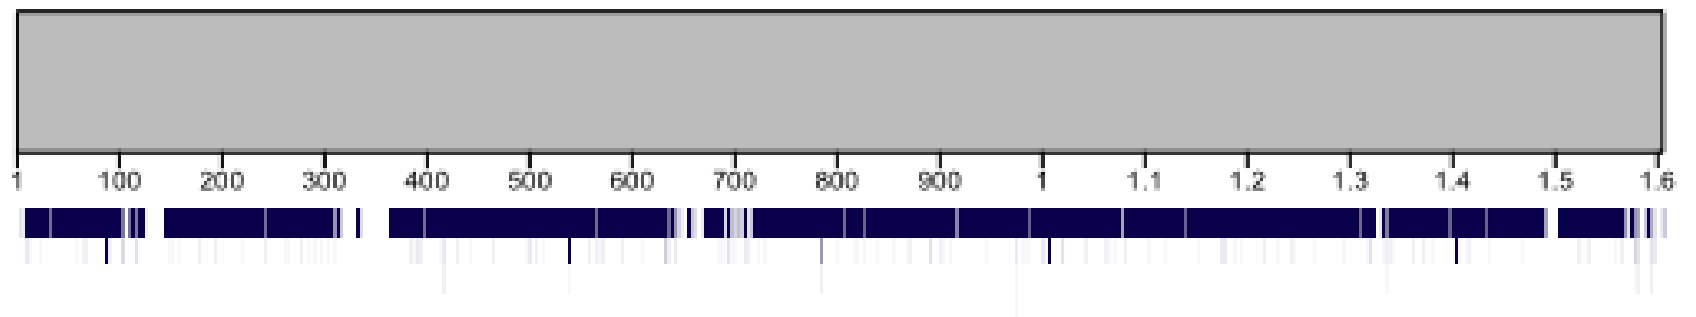

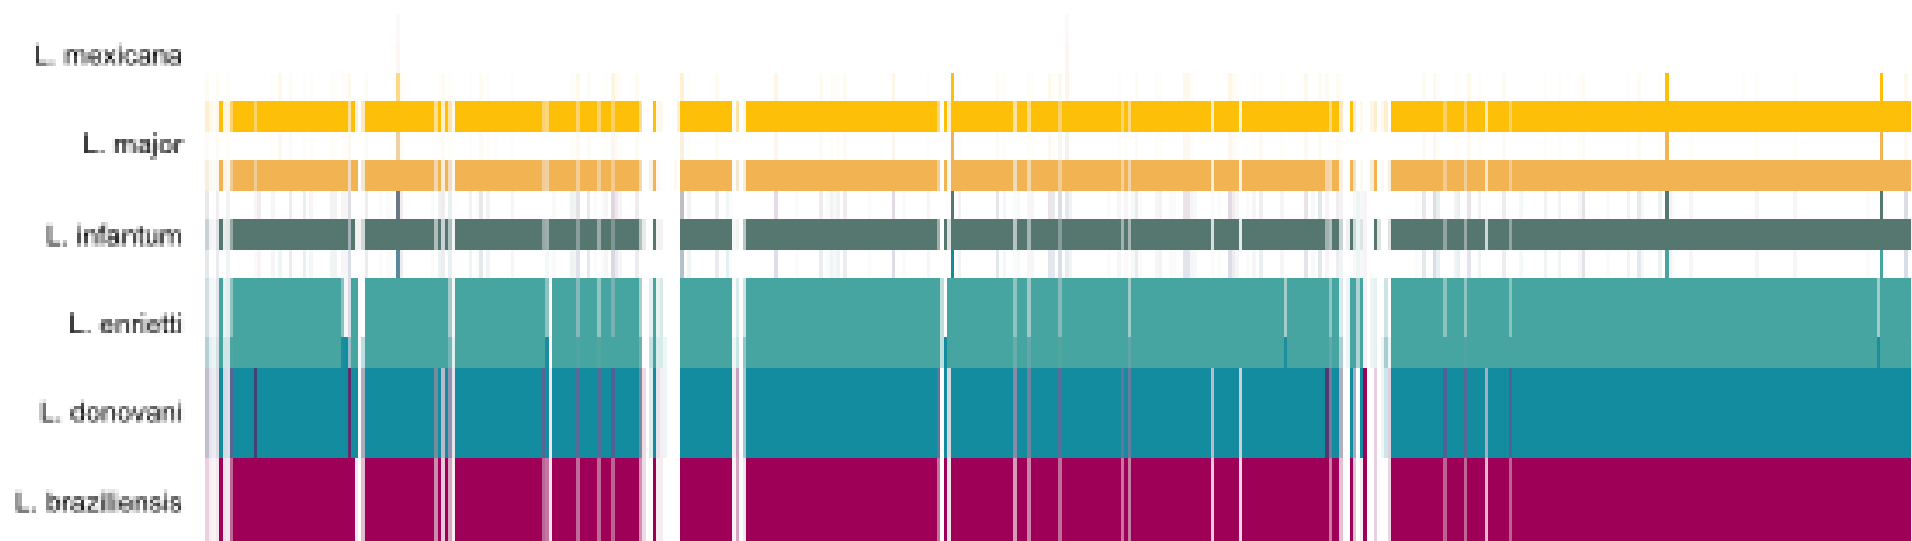

Chr34

De novo

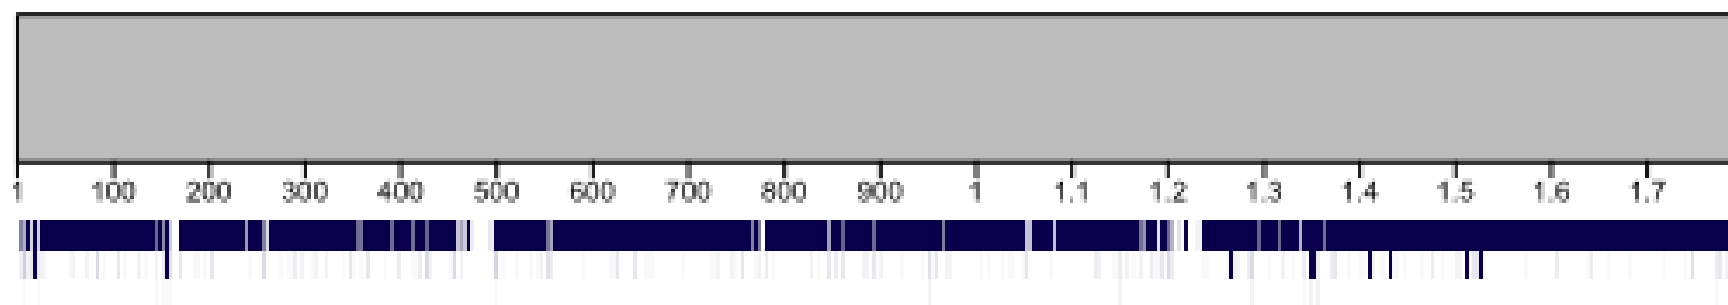



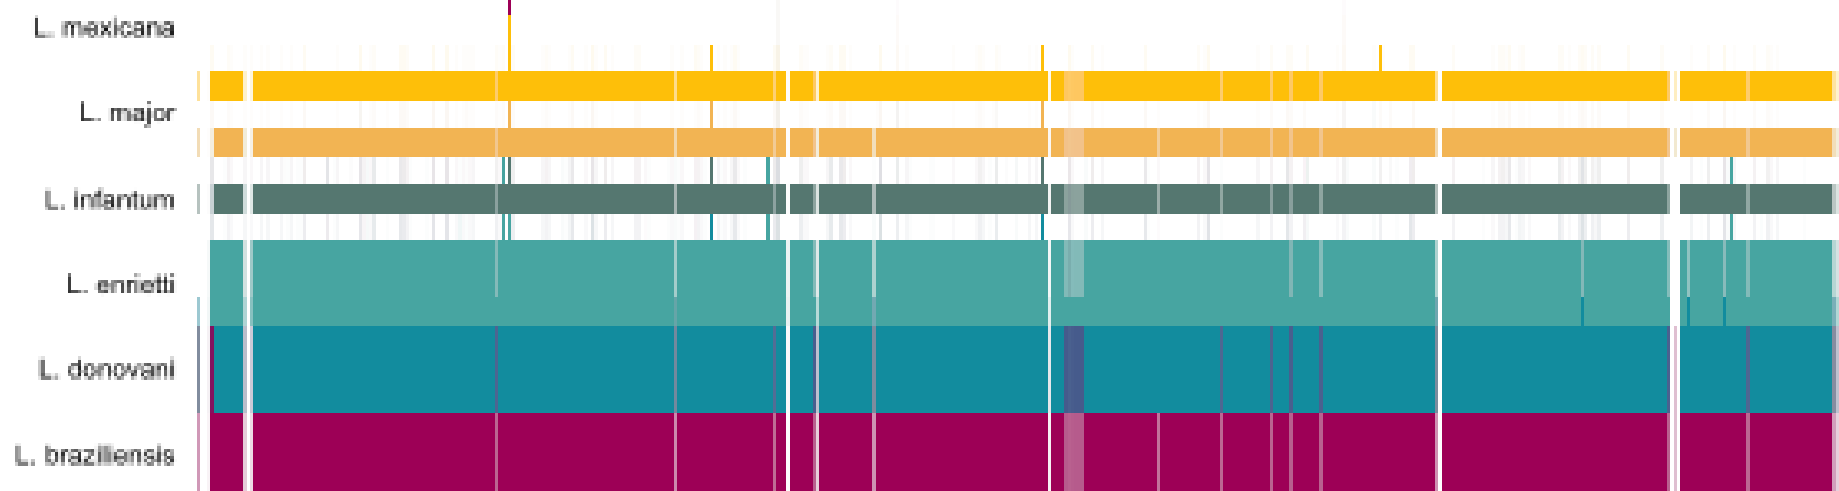

Chr36

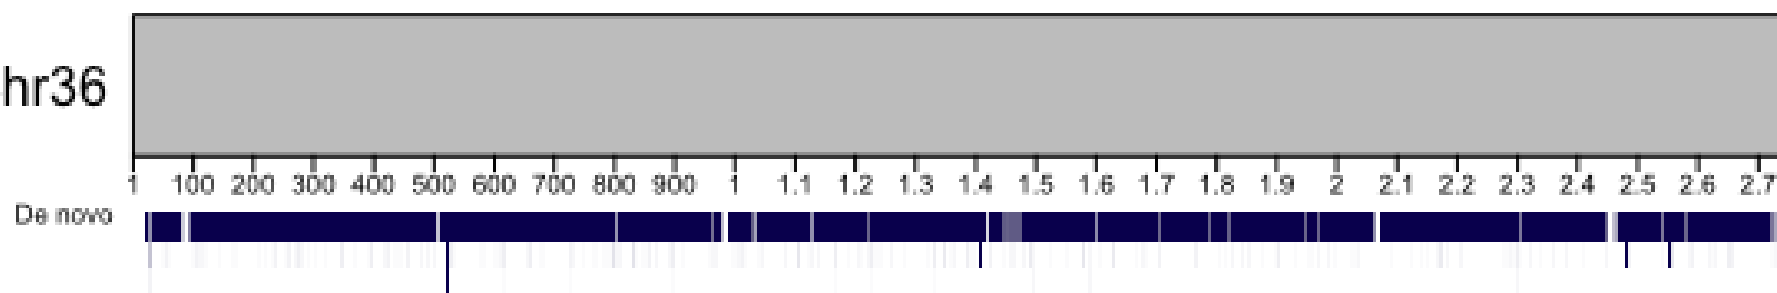

Supplement: s1 [file s1]
